# Supplementary material for: Tentaclins – a Novel Family of Phage Receptor-Binding Proteins That Can Be Hypermutated by DGR Systems
Source: Preprints.org preprint supplement (doi:10.20944/preprints202311.0981.v1), 2023-11-15
Supplement: Supplementary file 1 [file Supplementary_data_S1.xls]

## Sheet: Sheet1
contig_id	feature_id	type	location	start	stop	strand	function	aliases	figfam	evidence_codes	nucleotide_sequence	aa_sequence
nd4	fig|12333.104.peg.1	peg	nd4_144_719	144	719	+	Phage head, terminase subunit Nu1				atgccgaacccaaccaacaacaagctcgtcgacagcaagaccatcgcggccctgttcgacatgacgccccgccgagtgcagcagctcaccaaggagggcgtcatcgccgcggtcaaggaaggcaacgccaaccgctacgaccttctgccgacaatccagaggtacatccgatacctgacggccaaggccaacggccgggagccgtcgaagaaggacagcgagatcgagggccggcgtctggaggctgaggccgacctcaagcgcagcaaggcagacatcgccgccctccagctcagcgagctcgagggcaccatgcaccgcagcgaggacgtcgaggctgtgatgaccgacctcgtctacaacatcaggtcgatgctcgtggccctgccgggccgtctg…	MPNPTNNKLVDSKTIAALFDMTPRRVQQLTKEGVIAAVKEGNANRYDLLPTIQRYIRYLTAKANGREPSKKDSEIEGRRLEAEADLKRSKADIAALQLSELEGTMHRSEDVEAVMTDLVYNIRSMLVALPGRLAVDVTGAATPAEASEIIRTEVYKSLTELAGYKYDPEVYARRVRDREGWSEQLADDADD
nd4	fig|12333.104.peg.2	peg	nd4_703_2625	703	2625	+	Phage head, terminase DNA packaging protein A				atgacgcggacgactaaaaaagccgccgcgaagctcaataccgccatcgccggagcggtcaaacgcttcgccccgcctgagagtctgaccgtggacgagtgggccgacaagcaccgccgcctctccccggaaagctcggccgaggccggcccgtggcgtaccaagcgcaccccgtacctcgaggagccaatgcgggcctttacggatccgaaggtgcacaaaatagtcatggtggccgcctctcaggtcggcaagtccgagctcgagctcaacatcatcggctacatcatcgaccaagaccccggcagcatcctctacgtccacccgaccatcgacgacgcccggaagttcagccgcctccgcgtggcccctatgatccgcgacagcaagcccctgaag…	MTRTTKKAAAKLNTAIAGAVKRFAPPESLTVDEWADKHRRLSPESSAEAGPWRTKRTPYLEEPMRAFTDPKVHKIVMVAASQVGKSELELNIIGYIIDQDPGSILYVHPTIDDARKFSRLRVAPMIRDSKPLKAKVHDVKAKDSGNTILQKSFPGGMLTLTGSNSASALASTPARYIIGDERDRWATSAGTEGDPWALAEARQATFYNAKAVEVSTPTIKGNSNIETSFYQGTQERWCHRCPECGEYSEIVFDNIHFDPEVKRIRGKKSWSLKSGVSWSCPACGCLIPEDVMRKQPAKWIADNPDAYKKGVRSFWLNAFSSPWTPWEKIVLKFLDAKDDPQRLKVVYNTLLGQLWEDRGDLEDEDTMLARREDYGTRPDGTPVELPDGVLVLTCGVDTQ…
nd4	fig|12333.104.peg.3	peg	nd4_2641_2907	2641	2907	+	Phage head, head-tail joining protein W				atgagaaagacccgcgaacaaatcgagtaccagctctccatcaagaggaaccggctggagctctacctgaagcgagaggccgagatgctggacggaggcgtccagagctacggcatcggctcgcgcaatctggcccgctacaacaccgacctcggatccatccgggccgccatcaaacagctcgaggcagacatcgaagccctcgaggccgcactgaacggcgagaagccgcgaaaagctgtgggagtagtgccccgagactggtga	MRKTREQIEYQLSIKRNRLELYLKREAEMLDGGVQSYGIGSRNLARYNTDLGSIRAAIKQLEADIEALEAALNGEKPRKAVGVVPRDW
nd4	fig|12333.104.peg.4	peg	nd4_3064_4641	3064	4641	+	Phage head, portal protein B				gtgaataagggctacggcgacgccggcgcgagctggcacaagaaggcgaccaagggcttcagagctatgagcggcagcccgaaggaggacatcgacgccaacaactacaccctgcggcagcgtgcccggatgctttacatggcggccccgatcgccacctctgccatccgcaccaaccgcaccaacgtcgtcggcatcggcctccagctcaagagtcggatcgaccgcgaggcgctcggcatgacgcaggaggccgccgacgcatggcaggctcaggccgagcgtgagttcgctctctggtctgagaacaaaagggcgtgcgacgccaccggcgtcaacaacttcgcagccatgcagcagctcgcactctcctcgtggctggtcagcggcgacgtgttc…	MNKGYGDAGASWHKKATKGFRAMSGSPKEDIDANNYTLRQRARMLYMAAPIATSAIRTNRTNVVGIGLQLKSRIDREALGMTQEAADAWQAQAEREFALWSENKRACDATGVNNFAAMQQLALSSWLVSGDVFAVVKQYEPTPLTPYSLRLHLIEADRVATPTTSGIITPMLLTTGKAANGNTIYDGVEVNGDGQIEAYHIRSTYPFELGSTTTTWARVQAYGERTGLPNILHVMESERPDQYRGVSYLAQVIEPLLQLRRYTESELTAAVVESFFTAFIKTETGAGDNPFNEVGSSLPEVSRDPNEYEMGPGQINIMEPGEDVTFADPKRPASGFNTFLRAICEQVGAALEIPADLLLKSFNSSYSASRAALMEAWKAFRMRRKWFVDDFCTPVYEIW…
nd4	fig|12333.104.peg.5	peg	nd4_4628_5848	4628	5848	+	Phage head, head-tail preconnector protease C / Phage head, scaffolding domain Nu3				atgagaacgcataacactccccggctctgcgccgggcctcagactgcgggcacgccgatcaagttctggaacgtcgccagcatcggcgacgacgagggcgagatcaccctctacggcgacgtcgtgagccgtcagcctgttgactggtggacgggcgagcccgagcccggcctctacatcgcgcccgagagcttcatggaggatctcgcggccgtcaagggcaagagcaatatcaccatcaagatcaatagctgcggcggcgacctctacaccggcatcgccatccacaacgccatcaagggcctgaccggccacaaggtcgtcgtcgtggaaggcatcgcggccagcgcggccagtgtcatcgcctgcgcaggtgacgaggtgcaggtctatcccggc…	MRTHNTPRLCAGPQTAGTPIKFWNVASIGDDEGEITLYGDVVSRQPVDWWTGEPEPGLYIAPESFMEDLAAVKGKSNITIKINSCGGDLYTGIAIHNAIKGLTGHKVVVVEGIAASAASVIACAGDEVQVYPGSMVMIHGVAGLLYDYYTLADLKKLQKDFDASERAIAEIYHAKTGIEVDQLRSMMTRETWMVGQEAIDNGFADTLLTDEGPDVTLSADKKVLLVAGIRHDVKGFRHIPGTIPIDNSIHAAPAAGNKHAAAKNDGPKKEDNKTMTLEEMRAQHPDVVAQIEQQAAETARTQERARIEAIDSIAASVGDAQLVRDAKYGETPCTAEQLALKAMQKQAALGAKHLKDAKADNDESGAAGVGAAPNGGEEGSENDDKAKVDAIVGLYNSTK…
nd4	fig|12333.104.peg.6	peg	nd4_5848_6255	5848	6255	+	Phage head, head-DNA stabilization protein D				atgagcaagagactggatgaaaacctcggcagcgtcggctatgacggcctgatcgttgccaacgagcccgtcgctgacgtgttcaccgtgaccatccgcaaggaggccaccgccgcagccacctataagcgcggcaccgtgctggccctgtctgccggcaccgccgtcgacggcaagctggtgatcctcggctccaccgcgaccaccaacgaaaccctgaccgccaactgcatcctcgccgaggacgtggaagtcggcaccaccgcggacgtgaccgtgctggcctaccgcaccggccacttcgcccgcaacaagctggccgtcgcaagcggctacgccctgaaggcgaccgacgaggaggagctgcgcaaggccggcatcctgctctccgacgccatc…	MSKRLDENLGSVGYDGLIVANEPVADVFTVTIRKEATAAATYKRGTVLALSAGTAVDGKLVILGSTATTNETLTANCILAEDVEVGTTADVTVLAYRTGHFARNKLAVASGYALKATDEEELRKAGILLSDAIEY
nd4	fig|12333.104.peg.7	peg	nd4_6274_7344	6274	7344	+	Phage head, major capsid protein E				atgccttttaacttctacgacacccacacgctgctcatggccgtgcagcagctcacccctgctgcgaccttcctgcgtgaccgctacttccccaccaacgacgcgagcgacatcttcgccaccgacgacgtgctcgtcgagttccgtgacggcagcaagaagctggcgcccttcgtggccccccgcaagggcggcgtcaccgtcctgcgcgccggctacaatatggaacgctacaccccgcccttcgtggctccccgtcgtgtcctgaccctcgacgagctgcgcaagcgcggcttcggcgaggctctctactctcagctcacccctgagcagcgccagcagaccctcatcctgcgcgacgctgacgagctgggcgagctcatcaccaaccgcgaagaa…	MPFNFYDTHTLLMAVQQLTPAATFLRDRYFPTNDASDIFATDDVLVEFRDGSKKLAPFVAPRKGGVTVLRAGYNMERYTPPFVAPRRVLTLDELRKRGFGEALYSQLTPEQRQQTLILRDADELGELITNREEAMAAETMLTNGCVMKHIADDVDKADEMEIRFYSEASNPATYTPTAKWDATGGKILKDLEAMIRMLTKRGLRASDLVCSPDVADTIINDAAVQKLLDNRRIEIGNVEPELLPDGAAIVARLNVLGRIISVISYDLTYTDDEGKDKLYIPSGKCVLTAPGAGRTAYGAVSQVEQSDGEFHTYAGRRVPKYVSSAEGNSRTLTISSRPLMIPNNKNPFIVADVLTD
nd4	fig|12333.104.peg.8	peg	nd4_7367_7786	7367	7786	+	hypothetical protein				atgatccagatcatcaagggcaccttcggctactataacggccgcaaggtgatccccatcactgaagcagatggccctcagaagttcgacgacgagctggaggcccgtctggtgaaggaaggcgtcgccaagtacatcggcgagctgggcgagactgccgagcagcccgcacccgctcccggcgacgacgccgacgagcctgccagcaccaacaccgcggccgacgaggcccctgagtacaacgaggacatgaagctcgacgagctgaaggaagtggccacgcgctatggcgtggacgcctctgctatgcgcaagaaggccgacgtcatcgctgccatcgaggccaccaaggccgagcagcctgatgacggtgccgacgacgaggagccccctcagatc…	MIQIIKGTFGYYNGRKVIPITEADGPQKFDDELEARLVKEGVAKYIGELGETAEQPAPAPGDDADEPASTNTAADEAPEYNEDMKLDELKEVATRYGVDASAMRKKADVIAAIEATKAEQPDDGADDEEPPQIGAADPV
nd4	fig|12333.104.peg.9	peg	nd4_7786_8109	7786	8109	+	hypothetical protein				atggccttcagcttcaaggcgatggtcgaggctgaccgtcggcgcacgtttctcaatctcgacgagttcggtgagaagcacaccgtcgaaggcaaagccatcgccgccgtgctggacgacaacgccctgaaggaacgccaaggggggcaagagctgagcgtcgcggagtcctctctgctgctttacgcggcggtcgaggatctgcccgctcggcgcccggcgggcgaagggctcaacgtcgatggccgcgagtacatcgtcaacgactggagtgaggacatggggatcgccaccgtggccctcggccagactgtcaccatgtag	MAFSFKAMVEADRRRTFLNLDEFGEKHTVEGKAIAAVLDDNALKERQGGQELSVAESSLLLYAAVEDLPARRPAGEGLNVDGREYIVNDWSEDMGIATVALGQTVTM
nd4	fig|12333.104.peg.10	peg	nd4_8120_8737	8120	8737	+	hypothetical protein				atgtccatcgtcaacagcatcgaaaccgtccgggactggctgaccgccgaggtctgccctctggtcaagctgaagctccccgacgacaacgcaacggacgcctcctacccatacaagctggtaaacccggccgcgttctcgcttttcgtaccatcgaaggacaggacgcccccgaacatcgccgcgccgatcccgtcggtctgcgtgcagatcgttcagggcgacgacgacctgctccagagtgcccgagacatcaagatccggctctgcttctcagcgtgggatcccggctaccacgggcccgacatcttcaagccgaagggcgacggcagcggcacctacatccagcaatacaacgaggcggcggcctcctacttcgtgaagaacggagagggctgg…	MSIVNSIETVRDWLTAEVCPLVKLKLPDDNATDASYPYKLVNPAAFSLFVPSKDRTPPNIAAPIPSVCVQIVQGDDDLLQSARDIKIRLCFSAWDPGYHGPDIFKPKGDGSGTYIQQYNEAAASYFVKNGEGWRDAWNFVDTALRLIENAEYLGDLRVIKEKGITFGPVTEQDAVPDFYPYWFAWAEFSIEETLTRNPKSYQHLL
nd4	fig|12333.104.peg.11	peg	nd4_8785_10296	8785	10296	+	Phage tail sheath protein FI				atggcaaacgaatacctctacggcgcctacggccacatcggcgagaccgtggcacagagcgccgtgcaggcgggcaccacgccggtctatatcggcacggcacccgtcaacctcgtgcgcggcttcggcgaggccggcatcatcaacgcgccgatcaagatcaccagtctggtcgacgctcagaagaagatcggctactcgtccgactggggcacctttaccctgtgcgaggccgtgtacgcgcatttcaacaacaccctcgggaacatcggcccgatctacgtcatcaatgtgctcgacccctccgcgggcaagcaccgcaaggagacggccaccaccaagaccctcaccttcaccggcggccgcgccgagttcgccagcgacaagatcatcctcgac…	MANEYLYGAYGHIGETVAQSAVQAGTTPVYIGTAPVNLVRGFGEAGIINAPIKITSLVDAQKKIGYSSDWGTFTLCEAVYAHFNNTLGNIGPIYVINVLDPSAGKHRKETATTKTLTFTGGRAEFASDKIILDTLTIAKNDSGNYVEGTDYAVDYNFTKGTVIITSLKDDAQLAGSLTASFSEVDDSEIADSDIIGGVTSSGEYSGLSAIALLYPEQFAVCNLIAAPGWSHSPAVYNAMLTACKKINGHWDAFVVADLPLVDSTAQAVDTITKAIAWKKANAFTGERSKVYWPQAVDNLGNVFHLSTLAVVELMRADFSHNSVPMETCGNKAIPVIKQYFGANAKNRGFDQQSGKELTQNGISTAVAWGGEWVLWGDHTAAYTYGADVDPRAIFDVSMR…
nd4	fig|12333.104.peg.12	peg	nd4_10296_10808	10296	10808	+	hypothetical protein				atggcaaacctgtggctcgacctgaagggccccatcctcgccgataccgtctatgtggacggcgttctcgccgccaaggacgtgaccatcgccctgcctcccgtcaaccttgtgacggctgacttcaaggcgatgggaacctacacggcgccgctgcccggccagatcgaggcgatggaggcgtccatcaccaagatcggcattgacctcggcctgcgcagcctcgtcaagctgacgagcaagaccatcgagatccgctgggcgcaggacgtcaagctctccgacggctctaccaagaccgaaggctgcaaggcgttcctccgttgcgtctccaagggcatccccggcctgaacgtggatcccggcaacgccagcgagaacgagatcgcgctggccgtc…	MANLWLDLKGPILADTVYVDGVLAAKDVTIALPPVNLVTADFKAMGTYTAPLPGQIEAMEASITKIGIDLGLRSLVKLTSKTIEIRWAQDVKLSDGSTKTEGCKAFLRCVSKGIPGLNVDPGNASENEIALAVSRYQLFVAGNEYWLIDQLNTIMRVGGVDYAKDIRSVL
nd4	fig|12333.104.peg.13	peg	nd4_10864_11271	10864	11271	+	hypothetical protein				atggaaaagctgacacttcagaaccccatcaccatcaacggcaaaaaggtcaagactctgacctatgacaccgacgcgatcaccgtgggaatgtttgccgatgctgaggcccgcaagctccgcgcgacctccaacaagggcggcggcagcgccggcgcctgcgagctcgactactccctgcacgcctatctcgccatgatggcgatcgtcgccgtcaacagcgacatcgacgtcagcgacctcgagcgcatcagcggccccgacgtcatggagcttatgaggatcggccgaaattttactacggcgaggtcggcggcacaatccgaggaaagcggctcggagagctcgtccgagactactctcgagccttccacacctcagtcggcgagctccgacggg…	MEKLTLQNPITINGKKVKTLTYDTDAITVGMFADAEARKLRATSNKGGGSAGACELDYSLHAYLAMMAIVAVNSDIDVSDLERISGPDVMELMRIGRNFTTARSAAQSEESGSESSSETTLEPSTPQSASSDGNA
nd4	fig|12333.104.peg.14	peg	nd4_11384_13789	11384	13789	+	Phage tail, tail length tape-measure protein H				atggcaggcaaaaacaagatcatgcaggccgtcgtcagcttcgccggcaccatcgacccctccctcgggaaggcgatggacaacgtcgcgggacacctcgacaaagtaaactggaaggccgttgccgtcggtgctgccgtgggcggcatcgctgtggcgacgggcaaggcggtcgtcgaggccgggaagtatctggcagagctgggcgacgactacaacaaagccatgaaccagctctctgcatctactggcgccaccggcgacgagctggacgcgctgggcgagagtgtaaaaaacatctacgcgcagaacctcggcgaggacttcaacgacgtggccgaagggctggccgctacgcagaaagcgagcgatctggccggcgaagcactggagcaggcc…	MAGKNKIMQAVVSFAGTIDPSLGKAMDNVAGHLDKVNWKAVAVGAAVGGIAVATGKAVVEAGKYLAELGDDYNKAMNQLSASTGATGDELDALGESVKNIYAQNLGEDFNDVAEGLAATQKASDLAGEALEQATAAGFVLRDTFDYDISESARAASALMKNFNISAEEAYGLIATGAQNGADKNGDLLDTLNEYSAQFAALGLSADQFMGSLVEGADAGLFSIDKVADAVKEFNIRAKDGSDSSAEAFKGLGLNSDKMFAAFAAGGETAQAAFFDTVEALNKLEDPLKRNEIGVALFGSQFEDLEAGILPVLGDIETAAYDGAAALQQINDVKYNDLGSAFEAVKRSAEVALLPMASMIANTLTSLAPILTDTFEEISPVITDTLNACMPFVQDFLVGM…
nd4	fig|12333.104.peg.15	peg	nd4_13761_13985	13761	13985	+	Phage Tail Protein X				atgtcacagcagacagtcggctttattgattatgtggcgcagggcggcgacaccttcgacagcatcgcactcgtcgcctataacgaggagcgcatggcgagcaccatcatcgaggccaaccccgacctcagcgacgtgctgatcttcgagggcggcgaggctgtgcggatcccgatcgtcgagaccgtggagacgccggagaccctgccgccgtggaggaggtga	MSQQTVGFIDYVAQGGDTFDSIALVAYNEERMASTIIEANPDLSDVLIFEGGEAVRIPIVETVETPETLPPWRR
nd4	fig|12333.104.peg.16	peg	nd4_13990_14910	13990	14910	+	hypothetical protein				gtgaagatcctatacgaaggcgccgacatctacccggacgtcagcgtccaccgctgctatcacgatatgtacgccgaaaagcagagcgacgagctgctgctcaagctcaacgacacccgcgagctgtgggactcgtggaaccccaagaagggcgacaccatcgccatcgaggacggcgctgccaagacgggcaaaatgttcgtcgagagcgtcgtccccgagtccggcatcatcaccctgcgggcctattccgtcccgcagtctgcgaaggataagcggagcaaatcgtgggaaaaggtcaagttcctgcaactggctcaggagatcgccggccgccacggcctgacgctcgagacctacgggatcaccgaccagacctacgactacgtcgagcagaac…	MKILYEGADIYPDVSVHRCYHDMYAEKQSDELLLKLNDTRELWDSWNPKKGDTIAIEDGAAKTGKMFVESVVPESGIITLRAYSVPQSAKDKRSKSWEKVKFLQLAQEIAGRHGLTLETYGITDQTYDYVEQNNLADFAFFQNRCTLEGAAFLVYDGKLVVYDEAYMESQQPVDTITITPANDFEYRDEGTNAYGSAEAVNGGLTGTFAAPNGGDKVLRRILPFRMTDQSEADRFAKGLLRDANKNATVGTLWTGSLLRDYAAGSVVTLATEGVKSWDGTAFISRIRHDYVKTRSKLYLRKPLEEY
nd4	fig|12333.104.peg.17	peg	nd4_14910_15320	14910	15320	+	hypothetical protein				atgaacagcaacaaccaaatgatccagaagggcaagatctccagcgtggagggaaaggccgacaggaacggcgacaaaaccacggccagagtgctcccgagcaccgccgacagcatggtcacacggccgctgacgatcccgtggtatctgcgcggagagatgggaaacctgacccccggcacggaagtcgcctatgctatgttcgaggacggcaccggcatcatcctctcccgcatggacggagagtgggacggtatcgtcccgggcgacatcactgtcaagaagggcgcgctcacgatgcaggacaagggcatcagcgtcccgtcggcagacgtgaccgccacgggcatcagcctgaccggccacacccacaccgacagcatgggaggcggcacttct…	MNSNNQMIQKGKISSVEGKADRNGDKTTARVLPSTADSMVTRPLTIPWYLRGEMGNLTPGTEVAYAMFEDGTGIILSRMDGEWDGIVPGDITVKKGALTMQDKGISVPSADVTATGISLTGHTHTDSMGGGTSGPQ
nd4	fig|12333.104.peg.18	peg	nd4_15333_15887	15333	15887	+	hypothetical protein				atggccgtcatggcatcatggaacggcaagacgtggggcgtctccagccagaggatcgccgccctgaatggcgtctcctccagcgtcgagctcgacacggaaaacagcgacgacaaggccggatccccggccaccaagaccaaggcgctcaagctgcaaagcatgagcttcgacttcgatctggcgtctgccgtgggcggcgacgcccggggagagttcgagtcgtggacgtcactggtcgggcagtacgcccccttctatctggccggccggcgcttcggcccggccaatcttcagctcaccggcgtcagcctctcagacaccacactcgacaacttcggccggatcctgaagggcaagatcacgatcaacctgacggaatacgctgaggaggccagc…	MAVMASWNGKTWGVSSQRIAALNGVSSSVELDTENSDDKAGSPATKTKALKLQSMSFDFDLASAVGGDARGEFESWTSLVGQYAPFYLAGRRFGPANLQLTGVSLSDTTLDNFGRILKGKITINLTEYAEEASSKKAGAGGSSKSSSAAGVSSSGGVGRRLSAVTVGASSSDKAAKKPNNAQLK
nd4	fig|12333.104.peg.19	peg	nd4_15902_16174	15902	16174	+	hypothetical protein				atgaaagcatccggcaacggagcgcccgagatctgtgtgcagaacctcctcaagaccatccgcggggaggtgccctatgagcgcatcaaggggatcgaccgcacgctgatcgacaagccgagcgaaaccgctgcgaccgatctggccgccgacgtggagttcctcgtggaaacctacgagccccgcgtgcagctcagtgactccgacctgaaggctctgaccgctcaggccggcgacttcgagctgcgggccagcatcgacaacatcacatga	MKASGNGAPEICVQNLLKTIRGEVPYERIKGIDRTLIDKPSETAATDLAADVEFLVETYEPRVQLSDSDLKALTAQAGDFELRASIDNIT
nd4	fig|12333.104.peg.20	peg	nd4_16171_17580	16171	17580	+	hypothetical protein				atgaaggaggtgaacagcgtgagcgacgcgacaaacacctacggcgaggacatcaaactcaccacaacagacgcgagcaccctatacaagaccatcatcaccgagctcgaaaagggcgccggcgagccgctctacccgggcgacgagcgccggatcttcggcgaggctctcgtgcccgtgttcgttgccctctacaacagcctcaacgacgtcggccggcagacgctcctccgctatgcgaggggcgaggtgctggacgccatcggcgagcgacaggacgtgaaacgactggaaggcacaccggccaagacgaccatgcgcttctctgtctccacgccgcaggagaaaaacatcatcattccgaagtggacgaaggtgacgccggacagcgaaaactat…	MKEVNSVSDATNTYGEDIKLTTTDASTLYKTIITELEKGAGEPLYPGDERRIFGEALVPVFVALYNSLNDVGRQTLLRYARGEVLDAIGERQDVKRLEGTPAKTTMRFSVSTPQEKNIIIPKWTKVTPDSENYFATDEIAVLQAGAYSVEVPTSAVSNGTKFNGYAAGTITTIVDLIPYIESVTNLTETAGGDDGEPYSTEGDNRLRERIRLAPAKRSTAGPEQAYIYWVMTADSSIVDARAVSEKETVSETLTVYDGKAFKGGGTLLTDALVVKAHGQSAAAVKDADYTVDYTDGLLTITLKGSLSAAESVDIIITRTLEGCVKIVPLLEGGGIPDAAMLTKVLDVVNAKDIRPLTDKVSAVPPEVETYDIEIVYYTTPKNEAEVIANVEGTGGAIDR…
nd4	fig|12333.104.peg.21	peg	nd4_17581_18231	17581	18231	+	hypothetical protein				atgcggctcaatgagaccgagatggtcaagctgctgcctgcgtggatgcaggaggacggcagcgacaagggcctcgccaccggctgcgacatcatcagccgcgacgcctatgcgcgcctgaagctcctgagcaggtgggacaagatcgaccagctcaacgatgcagagctcgacgaaatggcgtgggagctgaacatccagtggtatgacagcaccgcgcccatcgcagtcaagcgggccgtcatccgcagcagcgaccgcgtctacgcgaaactcggcaccccatacgctgtggagcagatcgtggccgactacttcggcaccggcgaggtcagggagtggtatcagtacggcgggcagccgcatcacttcaaggtgctgagcgacaacccgagcctc…	MRLNETEMVKLLPAWMQEDGSDKGLATGCDIISRDAYARLKLLSRWDKIDQLNDAELDEMAWELNIQWYDSTAPIAVKRAVIRSSDRVYAKLGTPYAVEQIVADYFGTGEVREWYQYGGQPHHFKVLSDNPSLVNSNLDLFLKLLRTVKRRSSWLDAILICLTGEMFLYSGMAVRDHTKEVHVMGSDEIHIYHAAVVHDNNRETVSIGTDAAVISD
nd4	fig|12333.104.peg.22	peg	nd4_18247_18996	18247	18996	+	hypothetical protein				atggctgcatttatcaacaacgacatcaccaccgccggcctgatcgttctggcgaagggcgtggccggccagaagatcaactacaccaagatcgtcctcggcgatggctacctcgaggagggccagacgccccgcaccctcaccggcgtggtcagcccgaaggcgaccgtcgacatcacgaagctgaagatcaacggcgacggcaccgtggccgtcggcggcatcttcaccaacggcgacgagaccgatggcttctactaccgcgagctcggcctttatgccgaagatcccgatcccgaggtcggcgaggtgctgtactgctacggcaactgcggcgatctggccgagtggatcccgccctccggcggcgccaccatcgtcgagaaaaccatcgacatc…	MAAFINNDITTAGLIVLAKGVAGQKINYTKIVLGDGYLEEGQTPRTLTGVVSPKATVDITKLKINGDGTVAVGGIFTNGDETDGFYYRELGLYAEDPDPEVGEVLYCYGNCGDLAEWIPPSGGATIVEKTIDIVTAIGTATNVTAYIPADAYATKEDYETYKAIALGAQATAEEALALARQAIAIAQAAEASANDLSNAVGQNTSKIATLWDAVFSDITSNPFQITFADLTGITLKSGVWNASLQRLEC
nd4	fig|12333.104.peg.23	peg	nd4_18996_19253	18996	19253	+	hypothetical protein				atgggaaactgctacaactacaccccaatcccaccggccgaagcctcctgcatcatcgcgcacctgttcgtcgagctggccctgccctgctcctgctgcaagcgggaggacggcgtcatcgtcattcagggcaaaacctacgacggcagcagcgcccgcgtcacaatcaaaggcgaggaggtgagatactacggcaagcaacggacactcgcggccatacgagcgggccaatgtaggccgcccgcccttcggccgtga	MGNCYNYTPIPPAEASCIIAHLFVELALPCSCCKREDGVIVIQGKTYDGSSARVTIKGEEVRYYGKQRTLAAIRAGQCRPPALRP
nd4	fig|12333.104.peg.24	peg	nd4_19267_19665	19267	19665	+	hypothetical protein				atgcaggtcatcacggacgccaaggagctcgagaaacacacctacatcaagaccagaaacccggccgttttcccgaagaaggagcggctcggtctggcgcagaggatgatgaacgaggccagcgacctcgtcgccgatctgatggaggccaacgatctgctcctgacggatcccgaggagcgtgagctcaggtatcgcgcgcagcggtcggcgcttcgcaactgccgaaagctgatccaccacatcgagctcgcgcatgagatcctcagcggcttcagcgatgacgcctttgcatactgggcgaagatggcggccggcgtgaagaaccagaccgccaaatggtacaaaaccgataaagagagggccgccaagctggacgcgcagaagcgtcaccagtga	MQVITDAKELEKHTYIKTRNPAVFPKKERLGLAQRMMNEASDLVADLMEANDLLLTDPEERELRYRAQRSALRNCRKLIHHIELAHEILSGFSDDAFAYWAKMAAGVKNQTAKWYKTDKERAAKLDAQKRHQ
nd4	fig|12333.104.peg.25	peg	nd4_19662_19814	19662	19814	+	hypothetical protein				gtgaggcggccctcggggtatgccttgttttttcgtgccggctcggccaacaacgcccgcaacgtcaacaccgatggcactctgaacaggaacaacgcctacaacggcaacaacggcctgcgccccgcttcgatggatcgcccgacttattaa	MRRPSGYALFFRAGSANNARNVNTDGTLNRNNAYNGNNGLRPASMDRPTY
nd4	fig|12333.104.peg.26	peg	nd4_19985_21208	19985	21208	+	hypothetical protein				atggagaatatcgtaaacagcaccatcgcgctctacaaagcataccgcaaaacccgctgcggaaagcgcgacaacccgaccgccatgcgctaccgcatggaggccatcgagcgcaccgtcaccctctctgagaggctccagcggcgcgactattccttcgggccctactaccccttcaaggtgtacgagcccaaggagcggctcgtcctcgccatcgacttcgagggcaaagtcgtccagcactcgctctgcgacaacgtcctcgagccagcgttctcccggcgcttcatccgggacaactacgccggccagatcggcaaaggcacccacgacggcctcgaccgtctggctgcggccatgcgccactatttcttcagccgaaaggcagcagacgaagca…	MENIVNSTIALYKAYRKTRCGKRDNPTAMRYRMEAIERTVTLSERLQRRDYSFGPYYPFKVYEPKERLVLAIDFEGKVVQHSLCDNVLEPAFSRRFIRDNYAGQIGKGTHDGLDRLAAAMRHYFFSRKAADEAARKAAGLPPRPMNEWDYADGWVLKGDFSKFFYTLLHSYCYETARRALKWLKDPELIDFAEWPLWLIIDSTPDPGIPIGNQSSQLLALLYLDAFDHWLRDDRGLVYGRYMDDFYIIHSDKLLLRQILKEIEAYIKPLGLRLNGKTQILPLKNGIDFLGFHTYLTQTGKVVRKVRAKSIDNMKRKIRKFRGLVDSGKMTLDSVVQSYASWTGHISHGNTYHLRQNMDAYFFSYFPELKPSPKGDTTHGPKTEQPRKQVEGQVRQPVRQ…
nd4	fig|12333.104.peg.27	peg	nd4_21198_22826	21198	22826	+	hypothetical protein				gtggccgataagaaccacgcaggctacccctccaacagcgtcacgctcgtgaccaaccagatcatcaagatgctgtgcttcgacgcgacagaaccgagtaacggcaacagcgaccaccgcggctacggcaacaaccgctacatctactcgaacctgcgccagtggctcaacagccccgcggctgccggccagtggtacaccgcacagcactccgcagaccagacgccggactcctcccacgtctggaacggcgtcaacccgtacagtggcctcgccggttttctgaacgccttcaccgccaacgagcgggcggctctgctgaacaccaccatcacggtcggcaagagctccaccgatggcggcgggacggagacctgcacggacaagattttccccctg…	MADKNHAGYPSNSVTLVTNQIIKMLCFDATEPSNGNSDHRGYGNNRYIYSNLRQWLNSPAAAGQWYTAQHSADQTPDSSHVWNGVNPYSGLAGFLNAFTANERAALLNTTITVGKSSTDGGGTETCTDKIFPLSCTEVGLSGDHICGSKLAIFSDNNSRIATVTASCVANSNYSGNPGSGAAWYYWLRDAYAVSAHYARFVYTDGALDWGLAYVGYYGLRPACNLSSDLLISDSVDSDGCYTVIYNQAPTAPSSITVPSEVLGGENLSISWAASTDPDGNLSGYVLERKVGSGTWAQIYKGSSRSYTDAITYGWTSVQYRVKAYDAAGAESAYTTSVTRTVTNNRPPVISGTDGALGSFSTAAPSYEYTVTDADGHQVDVVEMLDGVTLRSYTVTLGHT…
nd4	fig|12333.104.peg.28	peg	nd4_22823_22993	22823	22993	+	hypothetical protein				atgattaagcacagacctgacagcatcaaagagctgaacgacaaacaggccgcagaggccgagaaggacaaaaccatcgccgaacaggccgacaccatcgagctgctgaagggctgcatcatggagctggccgacgtggtctacggcgacggaggggaggtaacagcatga	MIKHRPDSIKELNDKQAAEAEKDKTIAEQADTIELLKGCIMELADVVYGDGGEVTA
nd4	fig|12333.104.peg.29	peg	nd4_22990_23154	22990	23154	+	hypothetical protein				atgagcaagatcgtcgagctgtacgtcagggagctgacccgcgaaggctccaccatgaccatcaacgacgtcccgaagaagctgcgcaagcaggtcgaggacgccatcgctgccatcgaggcagccgcaaacgctggcaccgcgaaggaaggggcgaccgaatga	MSKIVELYVRELTREGSTMTINDVPKKLRKQVEDAIAAIEAAANAGTAKEGATE
nd4	fig|12333.104.peg.30	peg	nd4_23151_23342	23151	23342	+	hypothetical protein				atgatcgcccgggccctcgcgtggctattattaaaaattgcaggaaaggaggagcgtgaaatgctggtacgtctgtatgcaggcgagatcatcatgggccgcatcaccgaggacaacgtccccgcgaagctgaaggcccgcgtgcacaagtatctcgtcgacatgggctacttcgacgacgtcgaggagtaa	MIARALAWLLLKIAGKEEREMLVRLYAGEIIMGRITEDNVPAKLKARVHKYLVDMGYFDDVEE
nd4	fig|12333.104.peg.31	peg	nd4_23400_23765	23400	23765	+	hypothetical protein				atgatcgaaatcaacatcggcgcgctcgtcgtcctactggggatcccgacggccgcgaccggcttctgcttctggatgctcgagcacaggatccagaagcgcgagaagcaaaaggaggccgaggaggccaaacggcagaaagaggcagcggcccgagagcgtgcccgtgaagatctccagatcatcaccattcagggcacgtcggcagccatcgctctcggcgaggtgacggcccgggccgtgcagcgcatccctgacgcgcattgtaacggggatatgcacgcggccctcgactacgctgccaaaatcaaacacgcgcagaaggacttcctcaccagtcaggggatccacgcgatcatcgactaa	MIEINIGALVVLLGIPTAATGFCFWMLEHRIQKREKQKEAEEAKRQKEAAARERAREDLQIITIQGTSAAIALGEVTARAVQRIPDAHCNGDMHAALDYAAKIKHAQKDFLTSQGIHAIID
nd4	fig|12333.104.peg.32	peg	nd4_23779_24087	23779	24087	+	hypothetical protein				atggccgcaaagaagcgccggcgcaagcgtaaaaagaaaatcgaggcgagcaaaaagctcgcatactgggcggccagcgtggcaacgctcagcgcagccagctctctgctgctctctgccttcgggcgcgacccggtcggtgagctgaccggcaccatcttcaccgcctgcgtcggctatctaatcacatacgccggcaagagcctcggcgagaaaatcagccgaaaccgccacgggctcgacgccgacggcaacccgctcccggatccgtccggggacactctcaacaatgaggaggcaaaaggatga	MAAKKRRRKRKKKIEASKKLAYWAASVATLSAASSLLLSAFGRDPVGELTGTIFTACVGYLITYAGKSLGEKISRNRHGLDADGNPLPDPSGDTLNNEEAKG
nd4	fig|12333.104.peg.33	peg	nd4_24084_24398	24084	24398	+	hypothetical protein				atgaacaccatcgacaacacacccatcgtcaacgcagccctcgccctgatcggcgccggcgtcagcgttttcctgatcccgtggctgaagaagcagaccaccgaggcacagcgcaaggagctgaccgcgtgggtaaagatcggcgtcgctgccgctgagcagctctacgtcggacagggccgcggcgaggagaagaagcagtacgtcctcgacttcctgaagcagaagggcttcaaggtcgacgaggaaagcgtcgtcaacgcgatcgaggcaatcgtcaagcagctcaacactgagggcctgaccatcgaataa	MNTIDNTPIVNAALALIGAGVSVFLIPWLKKQTTEAQRKELTAWVKIGVAAAEQLYVGQGRGEEKKQYVLDFLKQKGFKVDEESVVNAIEAIVKQLNTEGLTIE
nd4	fig|12333.104.peg.34	peg	nd4_24453_24557	24453	24557	+	hypothetical protein				atgaaaaaccagaacaccgacgacatcaagctgaagcccggcgagaccgtcacagacgagactctcgacgagctgaccagcgggaaaggagacgacaatgagtaa	MKNQNTDDIKLKPGETVTDETLDELTSGKGDDNE
nd4	fig|12333.104.peg.35	peg	nd4_24550_25554	24550	25554	+	N-acetylmuramoyl-L-alanine amidase (EC 3.5.1.28)			isu;Recycling_of_Peptidoglycan_Amino_Acids isu;Murein_Hydrolases	atgagtaacagccctctggtggtctacaccaagctcagcccgaaccactcgggcaagcgcaccaagaagatcgacaccatcacgatccactgtatggccggcaactgctccgtcgaaacctgcggcaacctgttcgccaactctgcgcggcaggcgtccagcaactacggcatcggcaccgacggccggatcgccctgtacgtcgacgaggcaaaccgctcgtggtgcacctcgtccaacgccaacgaccagcgggccgtcaccatcgaagtcgccaacaacggcggcgcgcctgactggcccgtctccgcgaaggcatacgccgcgctgctggatctcgtgaccgacatctgcaagcgcaacggcatcaagcgcctcgtctggtcgaccagcaaaaac…	MSNSPLVVYTKLSPNHSGKRTKKIDTITIHCMAGNCSVETCGNLFANSARQASSNYGIGTDGRIALYVDEANRSWCTSSNANDQRAVTIEVANNGGAPDWPVSAKAYAALLDLVTDICKRNGIKRLVWSTSKNDRVNHLNGCNMTVHRDYANKSCPGDYLYNRHGRIAAEVNKRLGVKDAGSSTGGQTSGSTETGLKAGDVVDFKGTQHYTSAAAKDAKTCKPGKATITAVAAGKAHPYHLKAISGGGSTVYGWVNAADISTGSTGTATSYRVRTTADVLNIRKGPGTNYGVAGQIKGKGIYTIVAEAAGHGATKWGKLKSGAGWISLDYVTKL
nd4	fig|12333.104.peg.36	peg	nd4_26122_25619	26122	25619	-	hypothetical protein				atgggtacaaggtttagacgcagctttaaggtggccccgggtgtccgggtaaacctgaacaaaaagagcgcgagcatcagcttcggcccgaagggtctgaaacacacggtcagcacgacggggaaaagccacacgaccgtcgggatccccgggacgggtctgtcatatacgacgagctccggcgggaagtccggcgcacagcagggcgcggtcagcatccccgcagcgcagcggccgacgtcgccgaaaagcaagacggtggcgctgctgctgtgcatcttcctcggcttcttcggtgtccatcggttctatgtcgggaaaaccggcacaggcgtcatttggctgctgacggccggggcctgcgggatcggctggttggtcgatattttcaccatcctg…	MGTRFRRSFKVAPGVRVNLNKKSASISFGPKGLKHTVSTTGKSHTTVGIPGTGLSYTTSSGGKSGAQQGAVSIPAAQRPTSPKSKTVALLLCIFLGFFGVHRFYVGKTGTGVIWLLTAGACGIGWLVDIFTILLGGFYDSEGRVLRFQPTEAELAAAGEAPDPDAEE
nd4	fig|12333.104.peg.37	peg	nd4_26664_26777	26664	26777	+	hypothetical protein				gtggatgctgagcagatgaaaaaactgctcgagctgctggaacaggctctaaagtgtgaacaggttgccaccattacgatcacaataaagccgaaccaaaagcccaagcagtaa	MDAEQMKKLLELLEQALKCEQVATITITIKPNQKPKQ
nd4	fig|12333.104.peg.38	peg	nd4_26865_27128	26865	27128	+	hypothetical protein				atggacatctcgatcaaagtgacctacaaaagcgaggggctgcaaaagctccgcaaggctgccggcctgtctcagtctcagctcgccgatctggccggtatcaaggtgcaggtgctccagcagtacgagcgcggcgcccgagacatcaacggcgcgaagctgccgacgctgctgaagatctgcaacgcgctggagtgcaggctggctgacatcatcacagacgaggagacgctcgagctcctgaaaaagtacgaggaacactga	MDISIKVTYKSEGLQKLRKAAGLSQSQLADLAGIKVQVLQQYERGARDINGAKLPTLLKICNALECRLADIITDEETLELLKKYEEH
nd4	fig|12333.104.peg.39	peg	nd4_27187_28233	27187	28233	+	hypothetical protein				atgggacagcactggagccatctgacgccgaccaagcgcatccagctcgacgccttcatccgcgcaggaatgaagccgacagacatcgccaaagagctcggcgtgcatcacacgacgatataccgcgagctgaagcgatgcacctatgagcaccgaaacagcgactacaccaccgaaatcagatacaaccccgatggtgcgcaggctcgatatgaggcaaacctccgcgccaagggcccggagctgaagatcggcagcgactacgagctggccgactacctgatcgccaagatccgcgacgagaagtacagcccggaggccgcgatcggtgaggccgaggtcaagggctggcccttcaagacccacatctgcgcgagcaccgcctacaactacatccgc…	MGQHWSHLTPTKRIQLDAFIRAGMKPTDIAKELGVHHTTIYRELKRCTYEHRNSDYTTEIRYNPDGAQARYEANLRAKGPELKIGSDYELADYLIAKIRDEKYSPEAAIGEAEVKGWPFKTHICASTAYNYIRGEIFGDELTVSMLPQHGKRHQPERPAGSMPRKPAGRSIEDRPEHINDRSTFGHWEMDSVESCQGVSNTYIVMTERKTRWELIIPSPDKTAASVVAAIDGLEAKYGDLFPKVFRSITCDNGCEFADAAGIERSASGKGTRTEVYYCHPYRPSERGSNENQNGLIRRHLPKGTDLSTVSYEETKRIEDWLNNYPRKMFGYLCSEQLFREEIALILAS
nd4	fig|12333.104.peg.40	peg	nd4_28253_28621	28253	28621	+	hypothetical protein				gtgcatttactcttgacaaacggcttgctgtccattatcattaaacgcacagagactcaactgagtcggctgtgcgttttttctttactacaaccccatcggacggaggtgagactgacgggaaagtaccgctacctgaccttcgaggacaggaagaagatcgaggcgtggcatctgctcggagatcggccggtcgatattgcggcccgcctgagcgttcaccacaccaccatctacaaagagctccagcgaggcgcgaccggcacgctggacgccaaccagcgcgaagggtacagcgcagagctcgccgagaggcggctgcgtgagagcttcaagcgcagaggtaaacgagcaccggccgcacagtag	MHLLLTNGLLSIIIKRTETQLSRLCVFSLLQPHRTEVRLTGKYRYLTFEDRKKIEAWHLLGDRPVDIAARLSVHHTTIYKELQRGATGTLDANQREGYSAELAERRLRESFKRRGKRAPAAQ
nd4	fig|12333.104.peg.41	peg	nd4_28665_28856	28665	28856	+	hypothetical protein				atgagaagcagaagaaacaacacgaccctgacacgcaaggttgacaagtggaacccacgcaaagtgtggctcattaagcgctacgccgacggccactatgccatcaaccaagaagtcggcggtcgtgttttctattccagctaccagagagcaaccaaggcgcagatcgacacgatcttcgcctgctgctaa	MRSRRNNTTLTRKVDKWNPRKVWLIKRYADGHYAINQEVGGRVFYSSYQRATKAQIDTIFACC
nd4	fig|12333.104.peg.42	peg	nd4_28869_29603	28869	29603	+	hypothetical protein				atgcagccagtaaaaaccgagtacatcctgtcactgagctatggaaaggatagccttgcctgcctcggagccatcgagcacctcggatggcctctcgacaggattgtgaccgctgacgtgtgggctaccgacgacatccctgcggaatacccgcccgtcgtggccttcaagaagtatgtagacaattacataaaagagcattacgggatcaccgtggagcactactgcgcgaccagagtcgatggcatacaaaaggacaaggtcacatacaacgacggtttttaccatgttttgcagtctggcgatcacgctggaacaatcaaaggatttccgatgcagcgaggcccgtggtgccaaaaactaaagctcaacgctatggagcgagccgagaaaatggcc…	MQPVKTEYILSLSYGKDSLACLGAIEHLGWPLDRIVTADVWATDDIPAEYPPVVAFKKYVDNYIKEHYGITVEHYCATRVDGIQKDKVTYNDGFYHVLQSGDHAGTIKGFPMQRGPWCQKLKLNAMERAEKMAYEKLFYHVRESGKRKGQIVGFPFIGHPECQKTLKIGALRKMMKEVNGADHRVVQYLGIAADEPDRISSQAGKDNVMLPLVELGWEEDLCGLWCKYNGLLSPTYETSTRDGC
nd4	fig|12333.104.peg.43	peg	nd4_29676_29837	29676	29837	+	hypothetical protein				ttgaaatgggacgaggacagccccgtcacattcaagcctggcagaacagtccacgacttcgaccgccgtttcaagctcgaggacgaaggactgctgaaggctggcgacccctgcttcaaatggtcacagctcaacgaacccatccaactatctttattttga	MKWDEDSPVTFKPGRTVHDFDRRFKLEDEGLLKAGDPCFKWSQLNEPIQLSLF
nd4	fig|12333.104.peg.44	peg	nd4_29852_30130	29852	30130	+	hypothetical protein				atgaaaaaaacgaacgggatgaaatacgacgccgctctgatctgccggggatccttcccggcgacgctggaggaaaccgacgagtcctgcaccgtagaggtcacggtctaccggctgaacgccgtggccgccacagccttcctgctggacgggcccgagacgctgctgcggcacatcgggctcgacgagcgggacacctacaccaccaagcacgagatcgacgacctcgtcaccgtcgtgcacatcaccagagaggaggcaccagcatggcagcactga	MKKTNGMKYDAALICRGSFPATLEETDESCTVEVTVYRLNAVAATAFLLDGPETLLRHIGLDERDTYTTKHEIDDLVTVVHITREEAPAWQH
nd4	fig|12333.104.peg.45	peg	nd4_30118_30849	30118	30849	+	hypothetical protein				atggcagcactgagagacatcgcccgagacttcgccgcggaaatccgtgacggcatcggctggacaatcgtgtatcgcaccggccgctcgtggaacgccctgacgatctggagcgacatctggaacggcgagtgggagaccgacgatctcaacgacgccatcgggatcctgaaggcagacccggacgccgtcatcgtcaacggctactactgcggccacttcggtgagggcatgaccatcgacgagatcgccgccgggatccgctggcactacgaaggcggccacaaccgcctcgcggactattgcgaagtcacgcaaggccgggacgccctcgatgagggccgcaaggctgctgaagctgccggcctcccgttctgcgagcgtctggccgacggcggc…	MAALRDIARDFAAEIRDGIGWTIVYRTGRSWNALTIWSDIWNGEWETDDLNDAIGILKADPDAVIVNGYYCGHFGEGMTIDEIAAGIRWHYEGGHNRLADYCEVTQGRDALDEGRKAAEAAGLPFCERLADGGDDKLSPYVYDGSMALADHEKMQQAREAFDRLADALREIAAKLAEAMKPVINAVLSAFKKLWKVSVRAIGVPPKWLHLAAHAKKARTRKKYRNRIRRYVFEALAAEGGGGP
nd4	fig|12333.104.peg.46	peg	nd4_30846_31025	30846	31025	+	hypothetical protein				atgacagccaagtgcgtcggctgcgggctcgactggaacgtcagcatctaccagaagatcccccgcaccggctacatctgcccgcactgtgagagccggctccgcgccggcgagaccctgccaaacattcaggccagccagaaggctcggccgcagagaacgaaaggagcaaccccatga	MTAKCVGCGLDWNVSIYQKIPRTGYICPHCESRLRAGETLPNIQASQKARPQRTKGATP
nd4	fig|12333.104.peg.47	peg	nd4_31022_31726	31022	31726	+	hypothetical protein				atgaaaaagatcgcactcaagaacgccgcccgcggcacggccttcgactatgccggccagagctggatcctgctggagaatgatgacggccgcgccctctgcctgagcaaggacatcatcgagacccgagcctttgacgagggcaactgcaacaacttcgccgtcgccagcagcaaggaatacctcaacggcgcctacctcgacaacctgctcgaggacgtgaacggccccaacgccttcctgaccacggagctcgacctgaccaccgacgacggcctgaaggactacggcacctgcaccgtcaccatcttcctgctgacggtcgaccagtaccggcgcaaccgcgacgtcatcccgaacgcagacgactggtggtggctgtccaccgccttcagcacg…	MKKIALKNAARGTAFDYAGQSWILLENDDGRALCLSKDIIETRAFDEGNCNNFAVASSKEYLNGAYLDNLLEDVNGPNAFLTTELDLTTDDGLKDYGTCTVTIFLLTVDQYRRNRDVIPNADDWWWLSTAFSTKSNGYESLARYVYTDGTLYRDYAYYGHYGLRPACYLDSDLLISIEGDEATDDVTPEHAGEIIAALTEQFGGTFATEDQLTTALSFMLGTLRATREKEARHE
nd4	fig|12333.104.peg.48	peg	nd4_31719_32429	31719	32429	+	DNA polymerase III alpha subunit (EC 2.7.7.7)				atgagtaacctctccaccctgttcgaccgctacaaggccctcgtcgtgtttgataccgagaccagcggcctcgacttcgacaacgaccagatcatcgagctcgccgccctgcgcgtggaacgcacggccaccggcggcctacggatcgccggcaagatggacaccttcatcaagctgcccgagggcgagaccctcccggagaacatcgtcagcctgaccggcatcaccgacgagcggctccagaccgagggcgtgcagccggtcaaggcagccggccagatcgccaagctcatgcagaacggcccgaccctgatgatcgcccacaatgcacagttcgacgcctgtttcctccgtggcctgctccgcggccagaaggtcggccggatcgactggctggac…	MSNLSTLFDRYKALVVFDTETSGLDFDNDQIIELAALRVERTATGGLRIAGKMDTFIKLPEGETLPENIVSLTGITDERLQTEGVQPVKAAGQIAKLMQNGPTLMIAHNAQFDACFLRGLLRGQKVGRIDWLDSLTVYKDRRAYPHKLANAIIAYDLTGKVQNSHRAIDDVLALFEVLKAMDDEREDLGSYVNLFGYNPKYGVSGRRIVGVRYEPQSFSKGLTRPEQTLPARTGRK
nd4	fig|12333.104.peg.49	peg	nd4_32435_34111	32435	34111	+	hypothetical protein				atgataaagattttgatcggcggctctccgtgcacctactggagcgtcgcacagaaaaaggggcgagaggtcgaagctgaggggctcggctgggagctgttcagaaactacctgattgcaaaggaaaaattcaagcctgattttttcctctatgagaacaacaagagcgccgcacagcccattaaagaccaaatcagccacgagctcggcgtggatctcatgcacatcaacagcgccctcgtgagcgcacagaaccgtcaacgcttttacgccttcaactggaacgtcgaccagcccgcggatcgcggcatcatgctgaaggacatcctcgagacggcaacctccgaaaaagggtacgagctcagagctccggcggtcggagtcggatgcaggaaccgc…	MIKILIGGSPCTYWSVAQKKGREVEAEGLGWELFRNYLIAKEKFKPDFFLYENNKSAAQPIKDQISHELGVDLMHINSALVSAQNRQRFYAFNWNVDQPADRGIMLKDILETATSEKGYELRAPAVGVGCRNRREDDGKLYRRFETSGNEKANALTTVQTDSMVAEPIRIGTIENSAKKQSHDSKQYRVYSPEGKATTLCGEGGGLGAKTGLYAAPVRVGTMPNADGEVTGGQAHRIYDASGKAVALCARPNGGGPETGLYAYPAGEAQGAAWRGRDDGSAYEVRTDGKANALTASGHQSRLVVTNQNGEDLPVYEVVNGEIEIKGKKYPIKLPDGYYVIRKLTPTECERLQTLPDGYTSAVSATQRYRGLGNGWTAEVIIHILAGVLKDVPRDEEIVV…
nd4	fig|12333.104.peg.50	peg	nd4_34116_34379	34116	34379	+	hypothetical protein				atgagcccggagatcacgatcacgagcgaggagctgcgcgagcgcgtcgaggatcgcctcgaccgctggatccctgacgacgtctggaaccgtgccgagccctacgcccgccacaaaaacgaagtaaaccggcagcggtaccccgagatcgactactacgacaacgactacctcgtgctgctgaccgctgacaccgtccgagagaccgagttcagcgacctcactcacgccctctgtgatctgactgtcgcacgggctcagtga	MSPEITITSEELRERVEDRLDRWIPDDVWNRAEPYARHKNEVNRQRYPEIDYYDNDYLVLLTADTVRETEFSDLTHALCDLTVARAQ
nd4	fig|12333.104.peg.51	peg	nd4_34392_35072	34392	35072	+	hypothetical protein				atggaaaccacaaaagaaagggccgcccgttgcgaccgggcgacccatgcgagaagatccagcagcctgccagcatacggatcccgcaccgcaagtataacacgccggcgccgccgtgccaagaggaaagccctgagagctgccacgctggccgctgccgtccttctgctgggcggcatctctgtggcaatcttcaccaccccgaccggcagcaagcaggagaccaacatcctgccgccgaccaccaccgtcggcacatacatcccggacacctctgcaccggccgctgagaccgtggagccgaccgagcccgccgtgcgctaccctctgaccgacgccgagcgcgacgtcgtcgagcgcgtggtcatggccgaggccggcggggagtccttcgagggc…	METTKERAARCDRATHARRSSSLPAYGSRTASITRRRRRAKRKALRAATLAAAVLLLGGISVAIFTTPTGSKQETNILPPTTTVGTYIPDTSAPAAETVEPTEPAVRYPLTDAERDVVERVVMAEAGGESFEGQMLVAQCILNAAEKRGVDPSEAVVLYSYTKSRPDPTQRVKDAVAAVFDRGETVVDEPILYFYNPALVTSDFHESQIFVIEEGGHRFFAERSTR
nd4	fig|12333.104.peg.52	peg	nd4_35069_35218	35069	35218	+	hypothetical protein				atgaaacacctcaccgaaatgaagccgggcgagaccctgcacctccgcagcggccgcgacctcgagctcgagagcgtcacccctgtcacctgcggcgtgatgctcaccttcaacgtcaccgaaagaaaggagcacaacaatgagcaataa	MKHLTEMKPGETLHLRSGRDLELESVTPVTCGVMLTFNVTERKEHNNEQ
nd4	fig|12333.104.peg.53	peg	nd4_35208_35840	35208	35840	+	hypothetical protein				atgagcaataagaccaccgcggccctcgctgccgagcaggcagacgcagaggccaccaccacgcaggagaccgagctgctgcctgctgccacgctggacgagctggagcaggtcgacctcggcaccgtcgcagagggcgagcgcgccccgttccgtatcactgacgaccgctgcgccgactgggccatccgcaagatcgccgacgagcgcagcgagtacgaccgcctgaaggcgctggccgacgagcagatcgcggccatcaatgagaaagtcgccgccgcccgcaagcgcatggagaacggcacctcgtacctcacgagctgtctggccgacttcttcgccaccgtcccccacaagaagaccaagacgacggagaagtaccgtctcctctccggcacc…	MSNKTTAALAAEQADAEATTTQETELLPAATLDELEQVDLGTVAEGERAPFRITDDRCADWAIRKIADERSEYDRLKALADEQIAAINEKVAAARKRMENGTSYLTSCLADFFATVPHKKTKTTEKYRLLSGTLTFKKGTTKTKLDEAKLVPWLKANGYGELVKVEESTRWADLKKLLSYTGDIATLTETGEIVEGVTVYETPGIFTVDV
nd4	fig|12333.104.peg.54	peg	nd4_35853_36644	35853	36644	+	hypothetical protein				atggcagaaaccaagaaaaccgaggcggccgctgctgcggcccctcctgaagccgcctgcctgacgctccggcagaagctcgtcgaaatgcggaaagcctgcccggagatcgtcaagaagcagcacagcgacggcgtcagctacaagtacgccaagatctacgacgtgtgggagaagatcacccccataatgaacgagctcggcgtcgacttcgacgttatcagcgagcaggccacgcgccacgccgagaacggcgacccggtctactggatcaccatgcagaccaagacccgcaacggcgacaagctcatgttcctctacgaggccgacctgacgatccgctggctgaacctcgacaacgacgacgagaccatcgaggccaccgtccacgccgtcggc…	MAETKKTEAAAAAAPPEAACLTLRQKLVEMRKACPEIVKKQHSDGVSYKYAKIYDVWEKITPIMNELGVDFDVISEQATRHAENGDPVYWITMQTKTRNGDKLMFLYEADLTIRWLNLDNDDETIEATVHAVGWNDDPAKAKGAAHTYALKYYLFEKFTVDQGEDDPDNSDFGAQGKGSGAGGRQQATQGRQGQSSGRLSDAQLARLYKKAEAAGMTKERTNARIVEKYKKQDPAALTRQEYDEICTSLDNAAAQHNQQGGNA
nd4	fig|12333.104.peg.55	peg	nd4_36644_37066	36644	37066	+	Single-stranded DNA-binding protein			isu;DNA_repair,_bacterial_RecFOR_pathway	atgtataaccacaccggcctccaaggccgtctaaccgctgaccctgagctcaggtacacgcagcagggcacggcgatcaccagcttcaccctcgccagcgacaccggccgcaagaccaaggacggcaagaagatcaccaacttcatcgagtgcgtcgcatggcgcgcacaagccgagttcgtctgcaagtacctgagcaagggccgcctcgtcctcgtcgagggcgagctcacgagccgcaactacgaggacaaggacggaaaccgccgcaaagccgtcgagatcacggtcgactccgtccacttctgcgacagcaagaaggacggcggccagagctctggcagcgacttcgccgatccgggctactctgagggctccggcgacttcgcggagatcgag…	MYNHTGLQGRLTADPELRYTQQGTAITSFTLASDTGRKTKDGKKITNFIECVAWRAQAEFVCKYLSKGRLVLVEGELTSRNYEDKDGNRRKAVEITVDSVHFCDSKKDGGQSSGSDFADPGYSEGSGDFAEIEDNGDLPF
nd4	fig|12333.104.peg.56	peg	nd4_37141_37992	37141	37992	+	hypothetical protein				gtggcatggctgcaagtgcatcagacactcaaggatcaccgcaaactgttcgacgctgctgaccagctcgaagtcgagccgccgcacatgatggggctgctcgtctcgttctggctgtgggccctcgacaacgccccgaccggcagcctcgtcgacatcacgccgcgcatgatctcacgggccgctcagtgggacggagaccccgaaaagctggcgaaaacgctgatccgggcgggctggatcgacgaaaaagaggacgggacgctcgagatccacgactggtacgagtacgccggcaagctgatcgaccagcggcaagccgagaaagagcgctcccgcagtcgccgggccgctgctgcggcgtctgccgacgcctcgccggacgaccaaacgccgacc…	MAWLQVHQTLKDHRKLFDAADQLEVEPPHMMGLLVSFWLWALDNAPTGSLVDITPRMISRAAQWDGDPEKLAKTLIRAGWIDEKEDGTLEIHDWYEYAGKLIDQRQAEKERSRSRRAAAAASADASPDDQTPTAGRPANSRKKAGGRVDQSREDKTREGNTPPSPSDEGSDGGTKSLVEARFLEFWKAYPKKTGKQYALKAWNKIKPTAELHERIMQAVDAQKRSDQWRRENGRYIPNPSTWLNGGYWDNEEVNEGAENQRDPEQPDSSGRDWGKGFKPADDE
nd4	fig|12333.104.peg.57	peg	nd4_38165_38872	38165	38872	+	DNA replication protein dnaC				gtggctgcctatgagaaggcgaaggcagagcgcgaagctgctgaggccgcagccgccaaggctgaggaggagaagaaaatgcgggatcgcatcaagcgcatcgtcggcgagtcaggcatgggcgaccgtttcctgcggcgcaccttctccaccttccagctcaccgacaacaacaagcgagcagcggcagccgcccggcgctatgccgaaggcttcgacgccatgctgccgcagcccggccgtcaggaacccggccgcaacggtctgtttatcgcgggcccgccgggcactggcaagacccacctcgccgctgccatcgccaaccacctgatcgcgcaaggcaagccggtcatctgcatgacgatgatcgacctgctggagcgcatcaagcgcacctac…	MAAYEKAKAEREAAEAAAAKAEEEKKMRDRIKRIVGESGMGDRFLRRTFSTFQLTDNNKRAAAAARRYAEGFDAMLPQPGRQEPGRNGLFIAGPPGTGKTHLAAAIANHLIAQGKPVICMTMIDLLERIKRTYSTTGGSESGVLKIYKTVPLLVIDDIGKEPPTEWAISTVYNIINGRYEAYLPTIVTTNYDTEALIDRMTPRESHDSMTARATIDRLMEMCRGITLTGQSWRSR
nd4	fig|12333.104.peg.58	peg	nd4_38883_39413	38883	39413	+	hypothetical protein				atgaaaaaggtttacatctgctccccgtgccgcggggactacgagaacaacatccagcgcgccaaggagtacagccgcgcggctgtggagaagggcgtcatccccgtcaccccgcacatctatctcacgcagttcatggacgacaacgtccccgaggagcgtgagctggccctgaagatcggcagcgagctggtgctcggctgctccgagctgtgggccttcggtattgaccacccttcggccggtatggctgcggagatcgagctcgccacggcacacggcatccccgtccgcaacggcttcgaggccatcagcgagctgaagccggacgaggagctggaaaacagcgaggaggacaagccggacatcggcagcgtcacgttgcacctgcccgccttc…	MKKVYICSPCRGDYENNIQRAKEYSRAAVEKGVIPVTPHIYLTQFMDDNVPEERELALKIGSELVLGCSELWAFGIDHPSAGMAAEIELATAHGIPVRNGFEAISELKPDEELENSEEDKPDIGSVTLHLPAFRAMAVCNQHLDHGPISIELDGSVILELADRLISDPGVHIEIGG
nd4	fig|12333.104.peg.59	peg	nd4_39419_40024	39419	40024	+	hypothetical protein				gtgacgaagtacgacccgagaaagaacgcggagggctacaacgacccgacaccctacgcagccgaaaaacacatgatggcgcagatccgcggcaagcaggccagagtcgccggcggctacttcgagaatatcatctcggcctcgtgcgactactacctcagccgcggcctcgcaaagatcgaaaagacgccggagcccatgaagcccctcggcgccaagaaccgcaagggccagttcctcgcctgctataccaagcaggcccagccggactatggcggcaccctgaagggcggccggagcatctacttcgaggccaagcacaccgacgacgagcgcatcgagcagcgccggctcactcaagagcagcaggacgacctcgaggcccatcacaagctcggc…	MTKYDPRKNAEGYNDPTPYAAEKHMMAQIRGKQARVAGGYFENIISASCDYYLSRGLAKIEKTPEPMKPLGAKNRKGQFLACYTKQAQPDYGGTLKGGRSIYFEAKHTDDERIEQRRLTQEQQDDLEAHHKLGAIAFVLVSVSLTDFYRVPWPVWRDMAEIYGRKYMTHAELSRYEVPATAGFIKFLHGIESEVLGKEATT
nd4	fig|12333.104.peg.60	peg	nd4_40021_40185	40021	40185	+	hypothetical protein				gtgatcccgttcccggataagaaatacagcatcatctacgccgacccgccgtggagttacagcgacagcggatgctcgggcgcggctgccgcacagtacgcgaccatgagcatcaacgagctgaagcagctccccgtcaaccctgtgggggggtatagctgctga	MIPFPDKKYSIIYADPPWSYSDSGCSGAAAAQYATMSINELKQLPVNPVGGYSC
nd4	fig|12333.104.peg.61	peg	nd4_40202_40663	40202	40663	+	MunI-like protein				atgtgggccacatacccgaagatgcaggaggccctcgacctgatcgaggcgtggggcttcaaatacaagtcgatcgccttccagtggatcaagcagaaccgcagcggaaacggctactttttcggcctcggccgctggactcgaggcaataccgagccctgcctgatcgccatcaaaggcaagccgaagcgcatcagcgccggcgtcggtcagctcgtgttctcgccgctgcgcaggcatagtcaaaagcctgccgaagtgcgcgacaagatcgtcgagctgatgggagacctgccccgcatcgagctttttgcccgagaagccgccccgggatgggacgtgtggggcaacgaagcgccgacgcctgaagtcaaggacgcgccagtcgacagcgtcgag…	MWATYPKMQEALDLIEAWGFKYKSIAFQWIKQNRSGNGYFFGLGRWTRGNTEPCLIAIKGKPKRISAGVGQLVFSPLRRHSQKPAEVRDKIVELMGDLPRIELFAREAAPGWDVWGNEAPTPEVKDAPVDSVELAGKEETHEPDNQRDPAPQL
nd4	fig|12333.104.peg.62	peg	nd4_40623_40991	40623	40991	+	hypothetical protein				atgaaccagacaaccaaagagacccggcgccgcagctatgacgccgtactccccaagcgggccgcccgctgccgcctgatcctcgagaccctcggcaaccgtgagctcacagccagcgagatcaccgaggagctcgtcgcagccggccggatcccgtacttcaaccgcaactacgtcgcccctcggctcacagagctgaaggagatcgggatcctcacgacggtcggccgccgtaaggccacccgctcggacgccaccgaggccgtgtgggccagagcggagccttcaggccccacgggtcagacggccgcagcctacgcagacaacccgaccgaggccgagcagatgacgctcggatcggccacctaa	MNQTTKETRRRSYDAVLPKRAARCRLILETLGNRELTASEITEELVAAGRIPYFNRNYVAPRLTELKEIGILTTVGRRKATRSDATEAVWARAEPSGPTGQTAAAYADNPTEAEQMTLGSAT
nd4	fig|12333.104.peg.63	peg	nd4_41010_41381	41010	41381	+	hypothetical protein				atgaacgaacagaaccagcgcgacagcatcatgtcgatggcccgcggcgccttcgaggagcgcgtcgactatgagatggacaaggtgatccagaacatcctcgaccccaacacgaaggccacggccaagcgcaagatcaccctcaccatcgagctgaccccggacgacgagcgccgcaccatcggcgtctccgtgacggccaagtctacgctcgcagccaccaaccccgtcgccacggccctctatgtcacctctgacggcaacggcgagctcgtcgtcgccgagatggtgccgcaggtgcccggccaaatgaacatggacggcacgcagcaggaggccccgaagctcctgaagctcgtccagcacggataa	MNEQNQRDSIMSMARGAFEERVDYEMDKVIQNILDPNTKATAKRKITLTIELTPDDERRTIGVSVTAKSTLAATNPVATALYVTSDGNGELVVAEMVPQVPGQMNMDGTQQEAPKLLKLVQHG
nd4	fig|12333.104.peg.64	peg	nd4_41415_42128	41415	42128	+	Phage protein				atgctcgcaaaaatgatcgacaaaatcgtcagcctgaaggagaccaagatcttcgagattgacggccagacctacgccgacgcatcactcacccgcatcccgccgcacgtcgaccgccctgactgcatcagcgtcagcggactcgatagcatctgcaagctgatccgcaccgagctcgagaaggtcggaacgaccatcatggtgcaggtcaagagcaacgacaccgtcgaggtgatgaccacctacctgagcgacttctcccgcaacacgctctaccgcgccaaggctgacgccccgggtctgcgcaccggcttcagaggacgcgaggtagctctgatcgagctgcggagcctctgcatccccaacgagggcacggcctacctgctcgacctgctgagt…	MLAKMIDKIVSLKETKIFEIDGQTYADASLTRIPPHVDRPDCISVSGLDSICKLIRTELEKVGTTIMVQVKSNDTVEVMTTYLSDFSRNTLYRAKADAPGLRTGFRGREVALIELRSLCIPNEGTAYLLDLLSRMTNENSVSTNDNGVTQTVEARQGVALNAVVEIKPRVMLRPFRTFLEVEQPESEFLLRVDPDEGIGFFEADGGIWKLEAKKNIADYFLKNMGDLIDAGKVVVMQ
nd4	fig|12333.104.peg.65	peg	nd4_42183_42959	42183	42959	+	hypothetical protein				gtgaaagaatacgaaaccctcacccgtgagaaggtcgacgtcgtgcccttcggctgcggtatgccggagacccacctgatgcaggactggagcgacaggatgctcgacctgatcctgaacgggcccaccatcaacggcatcaagaaggacgaagcgcgggccatgctgcgcgagacctacacggccctgaagcagtacgagaagatcggcccgatggcctcgcccttcatcaacgacccgacggccatcgtggcccgggccttctctgagctctaccccggcgtcgagtacgtcgcgcagtacgtccccgacctgcgggacgagaccaacggcaccgcctacggcctgaccatctttcccgacgacggcagcacgccgatcgtctgcatctcggccgag…	MKEYETLTREKVDVVPFGCGMPETHLMQDWSDRMLDLILNGPTINGIKKDEARAMLRETYTALKQYEKIGPMASPFINDPTAIVARAFSELYPGVEYVAQYVPDLRDETNGTAYGLTIFPDDGSTPIVCISAEAPISAAPELLAHELAHVATPEDTEHGESWSAASEAIFKKYNELLDTMIPDEPEPIISPHQPGDGGILTMPLRDNIPEPPTDDWQLTTCPVCGAECWQTDTARRILALEPDVRTACTACALKGLGK
nd4	fig|12333.104.peg.66	peg	nd4_42975_43193	42975	43193	+	hypothetical protein				atgaacaacgaaagaaacaacacgacggccggcgggatcggcttctgcggccttctcgccgtcaccttcatcgtcctgaagctcaccggcgtcatcaactggagctggctgtgggtactggccccgatctggatcccgaccgccatcaccctcgccatcatcgtgatcgtgctcgtggccatactggtcagagagctgacgaagggaggccgcccgtga	MNNERNNTTAGGIGFCGLLAVTFIVLKLTGVINWSWLWVLAPIWIPTAITLAIIVIVLVAILVRELTKGGRP
nd4	fig|12333.104.peg.67	peg	nd4_43193_43555	43193	43555	+	hypothetical protein				atgaccacggaggaacgccgggccctgctggatcgtgcgatcacggcctacggcgcgccgacacaaatggacatggccgtcgaggagatggccgagctgaccaaagccctctgcaaaatcaaacgggcacaggctggctgcgaagtgaccgcagcgatcggcaacgtgatcgaggagatggccgacgtccagatcatgctcgaccagctccgcatcatcttccaccgatctaccgaggaggtcgaggaggcgaaactggaacggctgaaaaaccgtcttgacggccgaaacaactggcagggctccagcctccacaagtggatcgagaaacaattctccacaggaggtgacggccatgaataa	MTTEERRALLDRAITAYGAPTQMDMAVEEMAELTKALCKIKRAQAGCEVTAAIGNVIEEMADVQIMLDQLRIIFHRSTEEVEEAKLERLKNRLDGRNNWQGSSLHKWIEKQFSTGGDGHE
nd4	fig|12333.104.peg.68	peg	nd4_43548_44930	43548	44930	+	Adenine-specific methyltransferase (EC 2.1.1.72)				atgaataaaccgcagccgcagaccggccccgagatcgaggagtacagcaccacggccacgccgaaggcatacgccggcagcgtccccgtgttctgtgcacacgacgccatcgtcccgctgaaggatctgcggcccaatccaaagaaccccaaccagcacccgccggagcagatcaagctcctcgcctctatcatcagagcgacgggctggcgtgccccgatcaccgtcagcaagcgcagcgggctcgtcaccaagggccacggccgcctcatggccgcgcagctcgacgacctgaccgacgccccggtcgactatcaggactacgccagcgaggccgaggagctggccgatctgacggctgacaaccgcatcgcggagctcgccaccactgacaacaag…	MNKPQPQTGPEIEEYSTTATPKAYAGSVPVFCAHDAIVPLKDLRPNPKNPNQHPPEQIKLLASIIRATGWRAPITVSKRSGLVTKGHGRLMAAQLDDLTDAPVDYQDYASEAEELADLTADNRIAELATTDNKMLAEVFADIDTGEIPFMLSGYTEDDYGNIVTALSEALHTKEPSSDPDAEIPAPAAPVTQYGDLWILGRHRVLCGDCTRPEDRALLLDGNKPEILLTDPPYCSGGSKESQKSTGSIGTERKNGKAPKIANDILSTRGYQNLIRGALTDIPCLYAYIFTDWRMWVYLFDLVEAAGFGVKSEIVWDKGTPGMGVGWRSQHELILFGAKAATHFDGHKGYGNVLSISRSGNELHPTQKPVELLEKLVDNTDFATGVYDPFGGSGTTLAAC…
nd4	fig|12333.104.peg.69	peg	nd4_44943_45440	44943	45440	+	hypothetical protein				atgagcgagaagccgatcacacaacggatcaaggacaggctcgcggcctacaccgccatgctgagggacatcgacaaccagctcgaacgcctcgaccgtatggagatgacgatggcctcaccgcccggccctgatctgacaggtatgccacgcggatccggcacaccatccgaccgcaccggcatgatggtggagcggaaaatggagctcgaggaacagatcgaccggctcaaggctgaggagaagcaggagcgcaacgccatcgagggcctgatcctccagctctccgaccccgacgagcgcgccgtcatccggctgcgctacttcgaccgggctgactgggagagcacctgcggcgtcctgttcggtgatcggcgggactacgtcgacagagtggac…	MSEKPITQRIKDRLAAYTAMLRDIDNQLERLDRMEMTMASPPGPDLTGMPRGSGTPSDRTGMMVERKMELEEQIDRLKAEEKQERNAIEGLILQLSDPDERAVIRLRYFDRADWESTCGVLFGDRRDYVDRVDAYQNRTYKIHGRALLNLAAVLDELEPLPELRQ
nd4	fig|12333.104.peg.70	peg	nd4_45661_46314	45661	46314	+	hypothetical protein				atgccgcagaacagcatctcggcgcagctcagcaacctgcaccagctcgtcgctgacctcgaggcaatcgagaacggcggcaagaaggccatcagcaacaccatcaaggacgtcaaggccagagctccgggctggatcgctcaggaggtcacggccgtctacaacatcaagaagtcggagatcacgccatcgggcagcggcaagccgaagaagatggccggcagcatccagatcaccggcgagaccatcgaggagctcgccatcacctacaagggaaggctcctgactcccgtgcacttcggcatgacaccgaaggccccgccccgtggcaagagctacacgctgaaagcgcaggtgctcaaggggcagaagaaggtagttggccgctatttgaacaca…	MPQNSISAQLSNLHQLVADLEAIENGGKKAISNTIKDVKARAPGWIAQEVTAVYNIKKSEITPSGSGKPKKMAGSIQITGETIEELAITYKGRLLTPVHFGMTPKAPPRGKSYTLKAQVLKGQKKVVGRYLNTRTPGGPFSQRSHNILMGTGNTKSDGTSWIPFQRMSKTRTDIKKLTTISVPQMITSDRTNEAIMLRLNTETSKRLEHHMKRALGL
