# Supplementary material for: Tentaclins – a Novel Family of Phage Receptor-Binding Proteins That Can Be Hypermutated by DGR Systems
Source: Preprints.org preprint supplement (doi:10.20944/preprints202311.0981.v1), 2023-11-15
Supplement: Supplementary file 2 [file Supplementary_data_S2.xls]

## Sheet: Sheet1
contig_id	feature_id	type	location	start	stop	strand	function	aliases	figfam	evidence_codes	nucleotide_sequence	aa_sequence
nd12	fig|12333.103.peg.1	peg	nd12_80_820	80	820	+	hypothetical protein				atgcagagggttaaaagacgtattttttcgggcgttgtatgtgaacaagaggtttacaccgtatccgatcgagcgaacatcaagaaagctgaaccgcgaccgcgcttcaaggacgacgaagagcgcgcgcaacaccggatcggcatatcaaagcggaaacaccagcggctggttaatgaaaacttttcgccgctttccttatatagtacgctgacgttcgacgacgacagcgaagttcatacattcagcgaagcgcgcagaatacgcgacaattacttccggcggcttcaaagggcttgtcccgacgcgaagatcattatttacatggggcgcggcaagtctacgaaccgaattcattttcacatgatttcggacggcataccggaagaaacgatcagc…	MQRVKRRIFSGVVCEQEVYTVSDRANIKKAEPRPRFKDDEERAQHRIGISKRKHQRLVNENFSPLSLYSTLTFDDDSEVHTFSEARRIRDNYFRRLQRACPDAKIIIYMGRGKSTNRIHFHMISDGIPEETISGKWNDGSVIHIRHLREHNYYNGVDYGQDYTGLADYLFNHWTPEQGGHRWKATRNLRQPEKEAPTLALRTYTEKKAPIAPKGYKLVEARATKWGYIYYKYVREPEKPKRRKKRE
nd12	fig|12333.103.peg.2	peg	nd12_962_1102	962	1102	+	hypothetical protein				gtgcgaagcacggcgaagccgcttgcccttgataatgaaagcgcgggagtgataaaagcgggaaggcggcggggatataaaatcaatcgcgaaggatcggttcagaaaacggatcgaggaagctcgccggatcgccgatag	MRSTAKPLALDNESAGVIKAGRRRGYKINREGSVQKTDRGSSPDRR
nd12	fig|12333.103.peg.3	peg	nd12_1175_1870	1175	1870	+	Phage Type II Adenine-specific methyltransferase (EC 2.1.1.72) (ACLAME 22)				atgcttgaattgaacaagctgtataacatggactgtatgcagggaatgaaagagtttccggacggcttcttcgatcttgcgatcgttgatccgccttacggtatcggcatagacggacagaagaagcgcgtatgcggcaatccgaaacataaccgaaaagagcatatccggaaaagctgggacaaggctattcccccgcccgaatacttccgcgaattggaacgcgtttcaaaagcacaagtgatatggggcggaaattacttcgttccgtatcttgaacaaggacataaaggctggcttgtatgggacaaggggcaacacggcttgacaatgagcgattgcgaattagcgtataccagcttcgacacgccgacgcgcgtttttgtctgcaatcgcgtt…	MLELNKLYNMDCMQGMKEFPDGFFDLAIVDPPYGIGIDGQKKRVCGNPKHNRKEHIRKSWDKAIPPPEYFRELERVSKAQVIWGGNYFVPYLEQGHKGWLVWDKGQHGLTMSDCELAYTSFDTPTRVFVCNRVELLNDGTIHPTQKPVKLYSWVLSLFARKGMKILDTHAGSGSSLIACYRQGGLDYVGFEIDEDYCRAAQARLEQEQAQMRLFDLLEQEQRKAQITIFNE
nd12	fig|12333.103.peg.4	peg	nd12_1885_2214	1885	2214	+	hypothetical protein				atgcaggaaaaaaggacgctatatcttgccggaaagatcacgggcgatccgtattatttcacgaagttttacaacgcgcaaaagaagctggagaaaggcggcttcatcgtcgtaaatccggcgcttcttccggcggagggcttcacgtgggaagcctatatgcgtatgtccggcgccatgcttgcagagtgcgccgaagtctgttttcttccggactggaaagagagcaaaggcgcgaaatatgaattcggcgaagcaatggcgcagaacaagccgtttttcttcttcgctgattgggaacgggagggatcacagaatgcagaaaaataa	MQEKRTLYLAGKITGDPYYFTKFYNAQKKLEKGGFIVVNPALLPAEGFTWEAYMRMSGAMLAECAEVCFLPDWKESKGAKYEFGEAMAQNKPFFFFADWEREGSQNAEK
nd12	fig|12333.103.peg.5	peg	nd12_2201_2593	2201	2593	+	hypothetical protein				atgcagaaaaataaaatgcccgttccgacggaagcgcaagagcaaatgacgctgttttcgtgggcggctatgcaaagcgggaaatatcccgaattgaatttgctttatcacgtcccgaacggcgggagcagacacaaggcggaagcgggacggcttcgggcggagggcgtgaaagcgggcgttcccgatctatgcttgcccgtcgcgcgcgggcaatatcacgggctttacatagagcttaaacggcaacgcggcggcaggacaagcgatcatcaatcggagtggctggacgctctttcggcgcagggctacaaagccgcgctttgctacggctgggaacaggcggcgggaacaattatcgaatatctaaccggaggtggcacacatgactaa	MQKNKMPVPTEAQEQMTLFSWAAMQSGKYPELNLLYHVPNGGSRHKAEAGRLRAEGVKAGVPDLCLPVARGQYHGLYIELKRQRGGRTSDHQSEWLDALSAQGYKAALCYGWEQAAGTIIEYLTGGGTHD
nd12	fig|12333.103.peg.6	peg	nd12_2586_3194	2586	3194	+	hypothetical protein				atgactaaaaagcaaacagagctttccgaagagttgcgggaagccgtatttgaagccgcgcgcgcaggggcggcggaagcatacacacagaacacggggtacgtaaattacttcaaggcaatggaaacgttgctgtataactacaagaagctggcggcgcttgtagccgatgaagaagcgtattgcgaagttgagtatcacgcgggacgaaagacgttttcaacgacaccacaggcgaagggctttattcagcgcaagacggaagcggagatcgtcgaggaaatgcgagaggaaaaacaaaagcagttcaaagaaacgaaatccggctttgacagcttgacacgcgctatttctcttttcgaggggcataaagaattcgttgtgatccggctttactat…	MTKKQTELSEELREAVFEAARAGAAEAYTQNTGYVNYFKAMETLLYNYKKLAALVADEEAYCEVEYHAGRKTFSTTPQAKGFIQRKTEAEIVEEMREEKQKQFKETKSGFDSLTRAISLFEGHKEFVVIRLYYFGEDINGDPREGGTATWEEIAEELSDAGILKEIKTARRWRNKIVNDMAVCVFGIPAAVSAATYRKAVDK
nd12	fig|12333.103.peg.7	peg	nd12_3368_3715	3368	3715	+	hypothetical protein				atgaagccgtgggcggaaaggttttacaattcggacgcttggcgttcatgccgtgacagcttcttgaagtcgaagggctacttgtgcgaacgttgttcaacgccggacgatccagtaaccgcaaagatcgcacatcacaaaacatacttgacgaagcagaatatcaacgatccgtacatagcgctttcgtgggacaatctcgaagcgctttgtcaagattgccacaacaaagaacaccaccggaacgacaagaaaaaacggtacgcattcgacgaagcgggaaacctcatatccccccctattcgctcaaaatttagggagggttcgacaccgagggcgggagattaa	MKPWAERFYNSDAWRSCRDSFLKSKGYLCERCSTPDDPVTAKIAHHKTYLTKQNINDPYIALSWDNLEALCQDCHNKEHHRNDKKKRYAFDEAGNLISPPIRSKFREGSTPRAGD
nd12	fig|12333.103.peg.8	peg	nd12_3794_4147	3794	4147	+	hypothetical protein				atggcgacaaagaaggacttgacgaaagaagaaaagatcaagcgggagttttcccgattgaagcgcattttcaaagacttggataaaaacaagttgcagaccgtcgaaagccttatcaagaacgcggcgttcatggcggtatcccttgaagaattgcaagagatcatcaacgaagagggctacaccgtcgaataccaaaacggcgcaaatcagagcgggacgaagcaaagcgacgcggtgaaaacacatatcgccatgacaaaaaatcacgccgcaattatcaaacagctttgcgatcttgtaccgccggagaagaaaaaggaaagccgtttacaggcgttacgggacgaataa	MATKKDLTKEEKIKREFSRLKRIFKDLDKNKLQTVESLIKNAAFMAVSLEELQEIINEEGYTVEYQNGANQSGTKQSDAVKTHIAMTKNHAAIIKQLCDLVPPEKKKESRLQALRDE
nd12	fig|12333.103.peg.9	peg	nd12_4150_5802	4150	5802	+	hypothetical protein				atgcccttttcaaattacatttacgagtattacgacggcatttcttccggaaatataaccgtcggcaagtgggttcgccttctgtatgaatacatcgtgaaggggcttcaagaagggcttttcaccttcaacgcgaagaaggcaaacaaggcaattcggtttatcgaaaacttttgccatcattgcgaagggcgcacagaccttttgaagctggagttgtggcagaaagccgccgtttccgttatgttcgggatcgtcgaagaggacggaacgcgcgtctttcgcgaagtgtttattgtgatcgggcgcaagaacggcaaaacgctttttgcgtccgccgtcattgcgtacatggcgtatcttgacggagaatacggcgcgaaaatatattgccttgcg…	MPFSNYIYEYYDGISSGNITVGKWVRLLYEYIVKGLQEGLFTFNAKKANKAIRFIENFCHHCEGRTDLLKLELWQKAAVSVMFGIVEEDGTRVFREVFIVIGRKNGKTLFASAVIAYMAYLDGEYGAKIYCLAPKLEQANIVYDNFYQMIKKEPELSDLSKKRRSDIYIEESNTAIKPLAFNAKKSDGFNPHLVVNDEVASWRGDGGLKQYEVMKSALGARRQPMILSISTAGYENDGIFDELMKRSTAFLKGGSKERRLLPLLYMIDDVEKWNDLEELKKANPNMGVSVSPDFFKEEIAVAEMSMSKRAEFLTKYCNIKQNSSVAWLDYVVVDGAGIHAKLEDFKDSYAVGGIDLSQTTDLTAASVVIERDGVLYAFAQFFMPANRLETAQAIDGVPY…
nd12	fig|12333.103.peg.10	peg	nd12_5792_7042	5792	7042	+	Phage portal protein			isu;Phage_packaging_machinery	atgcggggtgataaaaacatgggagtttttgaaactatcttccggaagccgaaagccgacttgaaggcggaaggctatttcaaaatgctaaacgggtacacgcccgttttcagcaacgcgccggaaagtatttacgaaatggagcttacgcgcgcggcgatacattcgttcgcgtccttcgcttcaaagctgaaaccggagatcagcggcacggcgcaaaagaaccttgaacggacgttgcagttcaagcctaatccgttcatggatacatcgaagttcatttacaggatcgcgacgatcctttcggtgaataatacttgtttcattgttccgatcgaagatgaatttggcgggctgatcgggtattatcccctgcttcctcaacggtgcgaagttgtc…	MRGDKNMGVFETIFRKPKADLKAEGYFKMLNGYTPVFSNAPESIYEMELTRAAIHSFASFASKLKPEISGTAQKNLERTLQFKPNPFMDTSKFIYRIATILSVNNTCFIVPIEDEFGGLIGYYPLLPQRCEVVEYNGAPFLRYTFGSGQKAAIEFERVGVMTQFQYTDDFFGESNAALRPTMQLIHTQNQGIINGVKNSASIRFLAKVANMLKPEDITKERKRFTADNLSAENQSGMVIYDAKFADVKPIESKPFTVNAAQMAQINENVFNYFGTNAGILQNKYTEDEWNAYYEGKIEPFAIQLSLVMSNMTYTARELSFGNAITFTANRLQYASNQTKLNISTQLFDRGLLNRNGVMDVWNMAHVEGGEKYYIRKEYAEVSELGKEVTPNAKKDGSGV…
nd12	fig|12333.103.peg.11	peg	nd12_6996_7565	6996	7565	+	hypothetical protein				atgatccagccgctattgatcccgacggcggcggagaagcgaattgatacggatttctacgtggagggctacgcaacaacgttcgacaagccctatttgctgtatgagtgggacgggaacaaatattacgagcggatcgaccggaacgcccttgcgggtgcggatatgtccgacgtaatcatgcagtataaccacgaaggaaaggtgcttgcccgcctttccaacgggacgctgggcgttgaagctaacgataacgggcttttcacgttcgcggacttgtcgaaatcgcgcgcggcacaagatatgttcgaggaaatcaagaacggacttgttacgaaaatgtcgtgggctttccgcgtatcggaagatagctacgaccgcgacacacgcacacgcacg…	MIQPLLIPTAAEKRIDTDFYVEGYATTFDKPYLLYEWDGNKYYERIDRNALAGADMSDVIMQYNHEGKVLARLSNGTLGVEANDNGLFTFADLSKSRAAQDMFEEIKNGLVTKMSWAFRVSEDSYDRDTRTRTILKIAKVYDVSAVSIPANADTDISARSYFDGVIEREQQERLERRKKLLKIKLMTEV
nd12	fig|12333.103.peg.12	peg	nd12_7570_8730	7570	8730	+	hypothetical protein				atgagaattaaagaaatcgaagcccgccttgcggctatcaagcaggagatcgaacagcgcggcgacgctatgaccgccgcagagattgacgcgctggagcaggaaaccacacagcttaccgaagagcgcgccggactgattgccgccgccgagaagcgcaacggcattcttgacaatatcgcgaagggcgcgggcattgtttcccgttccttccagcagaacaacggcgacgacaacgccgcgcccgatgatcccttcggtacgcccgaatatcgttccgcgtggctgaaaaacattcgccgccttccgctgaacgacgcagagaagcgcgcattcagcaacgccagcggcgcgggtgcggaggttatcccgacgcagaccgcgaacgagattatcagc…	MRIKEIEARLAAIKQEIEQRGDAMTAAEIDALEQETTQLTEERAGLIAAAEKRNGILDNIAKGAGIVSRSFQQNNGDDNAAPDDPFGTPEYRSAWLKNIRRLPLNDAEKRAFSNASGAGAEVIPTQTANEIISKVKTLAPMLNEVTLLHVKGAVKFAIEGTNNAAAIHTENASITAAADTLTTVSLSGYEIVKLVQISDTVMTMSITAFESWIVNMLAEAIARKVEDLLINGTGSSQPKGIENANTWGATNSVTVAKTGALTAANVQTLIGLLPSGYDRNGKFVMNKKTLFTDFMPLQDNSKNHIVTVQNNAYFVYGYPVLLSDYVADHEAFLGDFKKVCANLAENIGVKSAYDIDTNSYKYSGIAIFDCAPAIGEAIVKLVKATA
nd12	fig|12333.103.peg.13	peg	nd12_8748_9047	8748	9047	+	hypothetical protein				atgcttgacaaggtaaagctggcgttgcggttgagcgggacggcgcttgacggcgaagtttccgatctcataaacgcggcgatcgctgatcttcgccttgtcggtatcaacattccggcggaagcgggatcgtccagtaaaacgctgggcgatccccttcttgatcgggcggttgtgctttatgcaaaggcggaattcggcttcaatgacgacgcggagcgttaccgcaacgcatacgattatttgaagtgcgccttgtcgctgaccgctgattacaccgaagaaagcgagggtaaataa	MLDKVKLALRLSGTALDGEVSDLINAAIADLRLVGINIPAEAGSSSKTLGDPLLDRAVVLYAKAEFGFNDDAERYRNAYDYLKCALSLTADYTEESEGK
nd12	fig|12333.103.peg.14	peg	nd12_9048_9401	9048	9401	+	hypothetical protein				atgagatggggcgaacaaataacattggttgccttgtctgaaccttcgccgcgcacgaacgaacacggcttccccgtcgcccgcacagaaaccgcgacaacggttttcgctgacaagaaatccgtgggcttttcggagttctacaaggcgcaacaggcgggctatacgacggaattaaaattcgacgtgcattccttcgagtatgaggaacagcagatcgtggaatatcccgtttcgagcgggaaacggtatcgcgtccttcggacgtacacgcacgggaacggagaatttacagagttgacgctggttaatcttccggaagcggaagggggcggcaacaatggcgaagtttaa	MRWGEQITLVALSEPSPRTNEHGFPVARTETATTVFADKKSVGFSEFYKAQQAGYTTELKFDVHSFEYEEQQIVEYPVSSGKRYRVLRTYTHGNGEFTELTLVNLPEAEGGGNNGEV
nd12	fig|12333.103.peg.15	peg	nd12_9388_9804	9388	9804	+	hypothetical protein				atggcgaagtttaacgttgtcgggctggacgacgtacaagaagcaatgcttcggcaagacgcgatcgttgaagaagccgtgccggaaatgctcaaagcgggtggcgcagtaatgcagaaggcacagcaagaagagatcaagacaaggttcaacagcagacgaagcacgggggcgcttcttgcgtccatcaaagtatccgccgtgaaagagattgacggcggaaaacgggttgaaatctatccgaacggaaaggacaagcacggagtacgcaacgcggaaaaaggcttcgtccttaattacgggcgttcaaatatgcccgcgcgcccgtggttcacggcggcgaatgaaaaggcggcggacgacgttgtttcggaaatgcgccgcgtatgggaggaaaag…	MAKFNVVGLDDVQEAMLRQDAIVEEAVPEMLKAGGAVMQKAQQEEIKTRFNSRRSTGALLASIKVSAVKEIDGGKRVEIYPNGKDKHGVRNAEKGFVLNYGRSNMPARPWFTAANEKAADDVVSEMRRVWEEKQNEER
nd12	fig|12333.103.peg.16	peg	nd12_9791_10123	9791	10123	+	hypothetical protein				atgaagaacgttgacagcttgttaaaagcggagcttgaaaagctgggcgttcccgtcgaacgccttaaatacggcgggaaggcggcttgctttatcgtctatcagcttgtcgtggggcgcgacacgttcttttcagacgatgaagagggcgcgcaggaattcacgtatcaagtacacgtctattcaaaaacggattacatcgacattcttcaacgcttgaaaacagcattgaaggcggcggggttctacgcgatcacgatagacgcggaaacatacgaacaggacacgggatattaccacgttcccgttgaaatcaagtatatggaggtatga	MKNVDSLLKAELEKLGVPVERLKYGGKAACFIVYQLVVGRDTFFSDDEEGAQEFTYQVHVYSKTDYIDILQRLKTALKAAGFYAITIDAETYEQDTGYYHVPVEIKYMEV
nd12	fig|12333.103.peg.17	peg	nd12_10127_10687	10127	10687	+	Phage major tail protein phi13				atggcaacaatcggtttgcgcgatctttaccgcgcacccatcacgatcggcacgtccggcgcggaggaatacggaacgcccgtgcgtatggcgaaagctatttcggcggagctttccgttgaagtcgccgaagcgatcctttacgccgacgacggcgcggacgaagttgtaaaagaattcgtatccggagaaatcacgctgaacgtgaacgatcttcttccggctgatcttgccgccctgcttggacagaagcaggacacggacaaggttgtttacggttctgacagcgacgaagcgccctataccgcaatcggcttccgcgcgaagaaggcgggcggaacgtacaagtacatttggctttacaaggtcaaattcgcgatccccgatgaaaactacacc…	MATIGLRDLYRAPITIGTSGAEEYGTPVRMAKAISAELSVEVAEAILYADDGADEVVKEFVSGEITLNVNDLLPADLAALLGQKQDTDKVVYGSDSDEAPYTAIGFRAKKAGGTYKYIWLYKVKFAIPDENYTTKGDSIEFTTPEIVGQFIKRSDGLWKAEHVAEPTNSVATAWFTSVREPNNAGG
nd12	fig|12333.103.peg.18	peg	nd12_10747_11136	10747	11136	+	hypothetical protein				atgagcgcaattaaagacggacgtttcccgatcatgctggacaaggaaagacaccttcttttcagtctgaacgcgatcgacgaaatgcaggacaaattcggcggcttcgatcgccttgataccgtgctttccggcaaggacagcattaaaaatcttcgctggcttctgaccgtgcttttgaatgagggcgcggcggacgacgaagaaccgcttaccgaaaaacaggtgggcaagctcattcatacgggcaattttgccgacgtgaaagcggcgatcttcaaatccttttctatgggcaacaacggaacgcccgaaccgcccgaacgggacgaagaggaagaggacgacgaagaggacatcgaaaaaaacgcaacagcgggcaaggaataa	MSAIKDGRFPIMLDKERHLLFSLNAIDEMQDKFGGFDRLDTVLSGKDSIKNLRWLLTVLLNEGAADDEEPLTEKQVGKLIHTGNFADVKAAIFKSFSMGNNGTPEPPERDEEEEDDEEDIEKNATAGKE
nd12	fig|12333.103.peg.19	peg	nd12_11205_11318	11205	11318	+	hypothetical protein				atgacaccgtataaaattttgacgcttttcaaaattcatcgtgaattcaatccggatcgtttcaagcccgttccgaaagaagttgatattgacgacgtgctgggagggatataa	MTPYKILTLFKIHREFNPDRFKPVPKEVDIDDVLGGI
nd12	fig|12333.103.peg.20	peg	nd12_11319_14252	11319	14252	+	hypothetical protein				atggcgaaagaagagcagatcaaaacatcaatcgaccttacaggcgaaaaagagtatcgcgccgcttgcactaacataaattcttcccttcgcgaaatcggatcggaaatgaagctgacgacggcggaattcgccgacaacgcagacagcgtggaagcgctgaccgcgaaacagaagctattacaaaagcagttcgacgaacaggcgaagaaggcagaagcggcggaaaaggcattgaagaaaatgcgcgataacggtatcgaaccgacaaatcccgcatatcagaaaatgcaaacaaatctgaacaacaccaaagccgacatggtgaaaattcaaaaggaaatcgacgacacttctaaaaagctgaaaagctcaaaggtggattgggagagcgtcggc…	MAKEEQIKTSIDLTGEKEYRAACTNINSSLREIGSEMKLTTAEFADNADSVEALTAKQKLLQKQFDEQAKKAEAAEKALKKMRDNGIEPTNPAYQKMQTNLNNTKADMVKIQKEIDDTSKKLKSSKVDWESVGETVGKAGKAIGAACAAMGAAIAAAGAAFFGLAEETREARENMGKLETSFTTAGHSAEDAKNTYTELYGVLGDDGQATEAAAHLAKLTTNEKELSDWTNICTGVYATFGDSLPIEGLTEAANETAKTGSITGNLADALNWAGVSEDDFQASLDACTSEQERQALITSTLNGLYSEAADKYREVNGDIIDAQKATANLNSAMAALGAIAEPIITKLKQLAAELLQEITPFVELIGKGLTGALSGAESAAEDFTDGLLGMVTFAIEKLT…
nd12	fig|12333.103.peg.21	peg	nd12_14249_15136	14249	15136	+	hypothetical protein				atgaggacacaagaaaaattgatctacacgaacgagcgcggggaaagcatagagttttcccccgcttcttcgtatcacgtaaacttcaaggacgttaccggactttccgacgtgcggaacgctatttacagcaccaacagcatggggcaggacggcgacacatacttgggctatcggatcgaaagccgcgatattgacatcgtgggatacatcaaggagcgggacaagcaagcggcgcagaacctacgccggaagctgaaccgcatattaaatccgcagtacgaagcaacgttgacgtatgttttcggcgacttccggcggatgatcgggtgcaagatcgacgacgcgccgatcttcaagcgaaagccgatcttcgagcaattcacggttagcttgtct…	MRTQEKLIYTNERGESIEFSPASSYHVNFKDVTGLSDVRNAIYSTNSMGQDGDTYLGYRIESRDIDIVGYIKERDKQAAQNLRRKLNRILNPQYEATLTYVFGDFRRMIGCKIDDAPIFKRKPIFEQFTVSLSCLNPFWREETETREDIATWIGGFEFPVPDGLELYDGWEIGYRQPSLIVNVYNSGDVKSGIRIEFRAIGAVTNPVLLNVDTREFIKLNISLVAGDVLTVSTGYGEKAVKLNRGGTITDAFRYLDVDSSYLQIAVGDNLFRYSADANAENLEVSIYHNNLYLGV
nd12	fig|12333.103.peg.22	peg	nd12_15141_16262	15141	16262	+	hypothetical protein				gtggaattatacgtttatagccgcgatatgacacttcaagggatcgtcgaaaagatttcgtccttgatatggacgcggcgttattggagttgcggcgaattcaagttgcttgttcccttcacggaggaacacgcccgcttgctggtgaaggaaaatatcatcatcaagcgcggcggcaacgaagcggcggaaatccgctatattcacatcacgaagaattcacagggcatggaggaaatagaggttcaaggcaagttccttctttcgtggatcggcaagcgcattttgacaacgcagatcatcacgaaggacacgacacagaacattctatacgccattgtgaagcagacttgcacgaacgcaggagcggcgcgcaatatcccgaatttcagcatatca…	MELYVYSRDMTLQGIVEKISSLIWTRRYWSCGEFKLLVPFTEEHARLLVKENIIIKRGGNEAAEIRYIHITKNSQGMEEIEVQGKFLLSWIGKRILTTQIITKDTTQNILYAIVKQTCTNAGAARNIPNFSISTTDADTGSGQIDYTSEQYANAQLAAETAAKAAKLGIRVLTNARTGKHTFSVYEGRDLTAGNTAGNAPCIFSQEFDNIVEQEYTNSVENLKTTAYVGGEEKEGVTRKVAEVGGSSTGLSRDEVFINATDIVQEYENESGQTVTLTNAQYLALLSARGVEELEQYAETLAFGSKINTNANLKYGTDYDLGDRVTCINKRWNVRIDVRITEIAETYETSGEEIDITFGESLPALLTQIRQITK
nd12	fig|12333.103.peg.23	peg	nd12_16279_17169	16279	17169	+	Structural protein				atggaaaaatcaagtttcttcaacagcgtttcgcacgatcgcacgtacaaggcggaggattgggcggaatacttcgcttcgttcatcgggaacggcgttttccccgtcccttcgacggggcttcaagtcgttgcaaacgacggaatgaagctgaacgttaaaacgggcaaagcgtggatcaacggttacttctacttcaacacgggcgatcttgccgtcgagcttgacacggcggacggacagttgaaccgcattgatcgcgttgtcgtgcgctgggatttgacaaaccgcgttatgtcggtgaaggtcaaatcttcttcgttcagcgcgtcccctaccgcgcccgcattgcagagggacgcggacgtttacgagcttgcgctggcggacatctacgtg…	MEKSSFFNSVSHDRTYKAEDWAEYFASFIGNGVFPVPSTGLQVVANDGMKLNVKTGKAWINGYFYFNTGDLAVELDTADGQLNRIDRVVVRWDLTNRVMSVKVKSSSFSASPTAPALQRDADVYELALADIYVGAGVTAITQSKITDQRLNTSLCGVVAAVVQQIDTAAFNAQLQAWFAEYQSLSAAEYNTLVSYMNSLKLQGNTQYEAFEQHMADFETQAAADFNAWFNGLQNVLDDNAATNLLNITNALDARVDMLEAVLFNDITTNPFLILFDDLDGVTSTGIWNESLQRIEC
nd12	fig|12333.103.peg.24	peg	nd12_17163_17549	17163	17549	+	hypothetical protein				atgctgacgcggtacgcttgcacggcggcggaattgtcgtgcgtgatcggaaacatcttcgcggagctttccccgccatgcgcggcttgcggcgcggaggtattacagatcacaggaacaacggttacagggaacgcggcaacgctgaccgttaccgaagcgggcttcgatttcgacgggtgcgccgacgataccgttatgatcgagcgaatgcggaaaggacggtgcatatatgcaaagaccggagcgggagcggaaagaaccgacggaattcaacgtgattgtgaaagcgaaagaccttgtaaagcacaccttcacgatcacgaattcgacggagcgctacccgaagaaataccgcttcacgcttgtaaacaggatacaggataa	MLTRYACTAAELSCVIGNIFAELSPPCAACGAEVLQITGTTVTGNAATLTVTEAGFDFDGCADDTVMIERMRKGRCIYAKTGAGAERTDGIQRDCESERPCKAHLHDHEFDGALPEEIPLHACKQDTG
nd12	fig|12333.103.peg.25	peg	nd12_17554_17799	17554	17799	+	hypothetical protein				gtggacatttacgaatgcgtccttgaagcgaacgaattagaccttcgggacgcgcaggaatacagacaacggcagaagctacaagcaaaggcgctgacctattgcaaggagcttctatttttcatagagctttcgcaggaaatgggctttatttctatgagcagttgcgaatattggtcaaaacttgcgcttgaagtgaagtacatgacgaccgcgtggaagaagcgggacaaaacgagagtttga	MDIYECVLEANELDLRDAQEYRQRQKLQAKALTYCKELLFFIELSQEMGFISMSSCEYWSKLALEVKYMTTAWKKRDKTRV
nd12	fig|12333.103.peg.26	peg	nd12_18096_19151	18096	19151	+	hypothetical protein				atgacagactttgaaaagatacacagttttgaaagcctatacaatgcctaccgaaaggcgcggcaaggcaagaggtggaaaggagcggcggcaaagtttgaagttaatcttcttgaagcgctgaacctattaagtgcgcagatcagaacgaagcgctataccatgtccccgtataacacgttcgaggtatacgaaccgaagcgccgcgtggttatgtcgaacagctacaaagacaaggttgttcaacattcgctttgcgataacgtgcttgaaccgattttgacacgatcgttcattcgcgataactacgcgtcgcaggtggggaaaggcacacattacgggttagacaggcttcaagagttcatgcggaggttttacaggaaaaacggaattgacggc…	MTDFEKIHSFESLYNAYRKARQGKRWKGAAAKFEVNLLEALNLLSAQIRTKRYTMSPYNTFEVYEPKRRVVMSNSYKDKVVQHSLCDNVLEPILTRSFIRDNYASQVGKGTHYGLDRLQEFMRRFYRKNGIDGWILKGDISKYFYSIRHDVLKTLIREKITDPDVLWLVDLIIDSTEDNVGIPIGNQTSQLFALLYLDGLDHFVKEKLGIKYYGRYMDDFFLIHHDKAYLQECRKQIEAFVQARGLSLNAKTNIFPLKHGVDFLGFHTYLTESGAVIRKVRRRSKNNMKRKLKKLAALHAAGRIDAKTVEQSYQSWRGHAEKGNSYHLIRRTDHYYNSLMKPKEAAQCQKH
nd12	fig|12333.103.peg.27	peg	nd12_19136_20875	19136	20875	+	hypothetical protein				atgtcaaaaacattaggcagtttgacggtgggcgcgaagattgaagttccggttctttcggcgtatcaatcacgcttcggatcgaagatcgttttcaagatcgccgacaagaaccacagcggctacccgtcgaattccgtaacgctgattacggaaaaaatcattcagttaatgtgcttcgacgcaaaggaagcaagcaacagcaacggcgaccggaaacaatacggcaataaccgctatcagcattcaaacattctgcaatggctgaatagcaacgcaacggcgggtgcatggtacagcgcgaagcacagcgcggacgcgccgcctacaaacgcgaacgtatggaacaattacaacgagtacgacgcgtgggcgggcttccttgctatgcttgatccg…	MSKTLGSLTVGAKIEVPVLSAYQSRFGSKIVFKIADKNHSGYPSNSVTLITEKIIQLMCFDAKEASNSNGDRKQYGNNRYQHSNILQWLNSNATAGAWYSAKHSADAPPTNANVWNNYNEYDAWAGFLAMLDPKFVAELLTTTQTVARNTVTDGGSYETVTSKMFLPSTTEVGLANENNIAEGTLLALFSNDASRVAYPTAQCVNNSEYTNANFSTSKGWYWWLRTPNSSNAYYVRYVYSGGSLSYGYAYFGYYGVRPLCNLKSSILVSDSPNSDGNYTVIYNSAPSAPPSITAPATCYSGQNINISCAAATDPDGDALTYCFERSYNSGAWTQVQASASRTFTEAVSTAWNTLKYRVRAKDSYGNYSAYTTSGDIAVIHNQPPVISGSNADLGIKRAD…
nd12	fig|12333.103.peg.28	peg	nd12_20872_21405	20872	21405	+	hypothetical protein				atgagcgtaattcacaagaagagcaacggcggagcttccaccgaaattgaaaaagaggttcgggaagtcaaagcggcgggagagcaaaccgccgctttgcttgccctatccttcaaagcgcagatcgtgcaggatcgcgccgccagaacgaacgtcatttccgacgcggcgatcctgcaatcggcggaagtgatcgaatacgacgaatacgccgacaatcacgcttacaacaccgtcggcgaaatcatcaagcacaacgggcggtattacgagatcaaagcggcgcacacgtcgaacgcggcggcttatcccgttgaaaccaccttcgcgtactatcgcttgatcgagctttccgcgaccggaacgcttgacgatccgatcccgtatccggaaacggcg…	MSVIHKKSNGGASTEIEKEVREVKAAGEQTAALLALSFKAQIVQDRAARTNVISDAAILQSAEVIEYDEYADNHAYNTVGEIIKHNGRYYEIKAAHTSNAAAYPVETTFAYYRLIELSATGTLDDPIPYPETAGIVVNVVSGLYYSYKGAVYLAKADMPNCVYPPDTAGLWQWEKVT
nd12	fig|12333.103.peg.29	peg	nd12_21424_21723	21424	21723	+	hypothetical protein				atggacactttcacaacggttctttccgtcttttctaccgtatgcgctatcgtgttcggctatatcgcttttgttcgtaacagggacaaggacaaggaaagcaatgtgaagcacgacgcgaccgttttaaccgagatcggatacatcaaggcaaacacggacgaaatcaaggcggagcagaaggaacagcgaaagacgaatacggagttcgtaacgcgcttgaccgacgttgaagcgtcggcgaaacaggcacacaagcggcttgaccacatcgaaaaacgaatggatcaagcagagtaa	MDTFTTVLSVFSTVCAIVFGYIAFVRNRDKDKESNVKHDATVLTEIGYIKANTDEIKAEQKEQRKTNTEFVTRLTDVEASAKQAHKRLDHIEKRMDQAE
nd12	fig|12333.103.peg.30	peg	nd12_21781_22773	21781	22773	+	N-acetylmuramoyl-L-alanine amidase (EC 3.5.1.28)			isu;Recycling_of_Peptidoglycan_Amino_Acids isu;Murein_Hydrolases	atgagcaatagcaaacttatttcgtgtacgctgatttcgccgaacaagaacagcccacgaaatcacaagatcgacacgatcacaattcattgcgtcgtcgggcaatgttccgccgagaggatcggcaaaatcttcaagccgacttcgcgacaggcaagttcaaactacgggatcggctacgacgggcggatcgggctttacgtcgatgaagccgatcgttcgtggtgcagttcttcggcggcgaacgataaccgcgcaatcacgatcgaggttgcaagcgacacaaagcacccatacgccgtgaatgataaagcatacgcggcgcttcttgatcttgtcgaagatatttgccgccggaacgggatcaaaaagctggtatggagtacaagcaaggacgac…	MSNSKLISCTLISPNKNSPRNHKIDTITIHCVVGQCSAERIGKIFKPTSRQASSNYGIGYDGRIGLYVDEADRSWCSSSAANDNRAITIEVASDTKHPYAVNDKAYAALLDLVEDICRRNGIKKLVWSTSKDDRVNHKNGCNMTVHRDYANKACPGDYLYNRHGEIAAEVNRRLDVPAEEQKPQGDAKNLYRVQLGAFEKKDNATAFAAKLKKEGFDTYIVQIGKYYKVQVGAFSVKKNTEAMLEKLKKAGHDDAFITYSGTSGGTSARKITTGSKVRVKAGAKTYSGGSLASFVYSRDHIVKELSGKRAVITYGGTVVAAVNVDDLTLV
nd12	fig|12333.103.peg.31	peg	nd12_22845_23153	22845	23153	+	hypothetical protein				atgaaaaacaaaccttcgagcgggaagcgggtggcgaagcgccgcttcttcaaggctgacgaacgcttcgcaacgaaagccgttattgtgatcgcaattacaacggcggctttcatcgtcgcgcagtacgtttcattccttatcacgcggcaggaacaaaccgttctgatcgaatggtatttccgcgccgtcgtgatcgaatgcggcgcaatgatgatgaagcgtcttgccgaagtaatcgtcggcaggatcaagaaaaaagaaaaaatcgacataacagaaagcgaggatacaaacaatgactattga	MKNKPSSGKRVAKRRFFKADERFATKAVIVIAITTAAFIVAQYVSFLITRQEQTVLIEWYFRAVVIECGAMMMKRLAEVIVGRIKKKEKIDITESEDTNNDY
nd12	fig|12333.103.peg.32	peg	nd12_23143_23484	23143	23484	+	hypothetical protein				atgactattgatcttaccagcattgcaaacgccgtgatcgctcttatcgcggctattattaccgccttcgtgatcccgtggatcagaagcaagacgaccgccgcacagtttgagaaaatcaaaatgtgggtaacggttgccgtcgaagccgccgaacagctttacaccggaagcggcaggggcgcagagaagaaagcatacgttgttgaatttctgaatagcaagggcttcaagatcgacgcggaaacgctggataaactgatcgaagccgccgtctttaatcttccggactacttcactatttccggcattccggcggataccgacagcaacaaagagtaa	MTIDLTSIANAVIALIAAIITAFVIPWIRSKTTAAQFEKIKMWVTVAVEAAEQLYTGSGRGAEKKAYVVEFLNSKGFKIDAETLDKLIEAAVFNLPDYFTISGIPADTDSNKE
nd12	fig|12333.103.peg.33	peg	nd12_23894_23589	23894	23589	-	hypothetical protein				atgttcgtcagctttacaaagacattgaagaagatgtccggtttccggctgggcttcggtgtgcgcgtgaataagcgaaacgcgccgttgtggtgcttcgctatgctcttcgccggaatgttctatttgatgtggtatatgattatcggcgcgggctggtgtctgtacttcttcttgtgggcgttttacaagatttattactatctattcaagggaattgcggtcggctgtaagaagctgtatcaactcattaaaggaaaaaccgccgcgccgtcggaagcgtcggtcgaaccgccgaatgaatga	MFVSFTKTLKKMSGFRLGFGVRVNKRNAPLWCFAMLFAGMFYLMWYMIIGAGWCLYFFLWAFYKIYYYLFKGIAVGCKKLYQLIKGKTAAPSEASVEPPNE
nd12	fig|12333.103.peg.34	peg	nd12_24056_24301	24056	24301	+	hypothetical protein				atgaagatatatgattacaacggcaagaagaacatttgcggcgaccgattgcgcgaagcgcgcgtcgtccggcggctacgtcaagaggatttagccgcacaaatacagttgaaagggatcaacatggagcgggacagcataagccgaattgaaatcggtacgcgcttcgtatccgactttgaattgaagatatttgcggaagtgctgggcgtttcagtaaattggcttttaggtatagacgaataa	MKIYDYNGKKNICGDRLREARVVRRLRQEDLAAQIQLKGINMERDSISRIEIGTRFVSDFELKIFAEVLGVSVNWLLGIDE
nd12	fig|12333.103.peg.35	peg	nd12_24426_24599	24426	24599	+	hypothetical protein				atgaaaacaaaagaccttatcgagcttttagaacgaaacggctggaagttcaagcggcacggcgcgaaccacgacatatacgtgaaggacggtcaaagggaaagcgtcgtaaggcacagagaaaccgacgaagagttagcaaaagcaatcatcaagcggcgcgggctgaaataa	MKTKDLIELLERNGWKFKRHGANHDIYVKDGQRESVVRHRETDEELAKAIIKRRGLK
nd12	fig|12333.103.peg.36	peg	nd12_24639_24836	24639	24836	+	hypothetical protein				atgaaattcaaaaagcaagcgaatgtcgcgttcttttcaaagtatgtccgcgaagatggaaagttcacgattacaagtgttgatcgccgcgtcaacgggactttgaaaaacgtgttcgaggtaacagacgaagccggaagcgtgatcgacacattgccgcgccttaaagacgcaaaagcaaaatacgcggagatttga	MKFKKQANVAFFSKYVREDGKFTITSVDRRVNGTLKNVFEVTDEAGSVIDTLPRLKDAKAKYAEI
nd12	fig|12333.103.peg.37	peg	nd12_24851_25252	24851	25252	+	Phage protein				atgaaaaacgcatatcctatcgttatgacgcaaggaaaagagttcatcgtggtatttgtccccgatttcaatatcaatacgcagggcaaggacgttccggacgcgatcgagatggcgcgggacgcaatcgggcttatgggaattgatatgcaggacgacggcgaagcgttgccggaagcgtcgagcattgcaagcgcacaagccgaagcgccgtccggcgcgatcgtttcgctggttgacgttgatttcgcggagtaccgcagaaagaacgatatgcgcgtcgtgaagaagaattgcaccattccttcatggcttaactttgaagcggagcgggctggcgtgaatttttccgccgtcctgcaagcggcgcttaaaagcgaattgcatatcacaagcaga…	MKNAYPIVMTQGKEFIVVFVPDFNINTQGKDVPDAIEMARDAIGLMGIDMQDDGEALPEASSIASAQAEAPSGAIVSLVDVDFAEYRRKNDMRVVKKNCTIPSWLNFEAERAGVNFSAVLQAALKSELHITSR
nd12	fig|12333.103.peg.38	peg	nd12_25320_26357	25320	26357	+	transposase, IS30 family				atgcacaaacacttgacttggacagaccgcctaaaaatcgaaaaaggcttgaaagagggcttgaagccttgcgcgattgccgaccgtctgcacgtccacaatacaacgatatacagggagttgaagcgcggacgctatacgcatttgaattccgacttgacgaccgaagaacgctattcgccggagatcgcgcaacagcgctatgaagagaacctaaaagccaaaggcggcgaattgaagatcggcaacgattacgaattatccgccttcatcgaaaagaagatcggcgaagaaggctattcccccgccgccgtcgtcggagaaatcaagcggctggggctgaccttcaaaacggagatcagcgaaaagacgatctataattacatcgacaagggtata…	MHKHLTWTDRLKIEKGLKEGLKPCAIADRLHVHNTTIYRELKRGRYTHLNSDLTTEERYSPEIAQQRYEENLKAKGGELKIGNDYELSAFIEKKIGEEGYSPAAVVGEIKRLGLTFKTEISEKTIYNYIDKGIFYGISRESLPEHGERKRKYDKVERKKAARAPQGESIEERPQEINDRQTFGHWEGDCVCGKKRTKETLFVLSERLTRNEIIIKMPDQTAASVVAALNKLERRFGKKFSQIFKSITFDNGSEFMDCAGIEKSVYGKDRKRTKVYYCHPYSAYERGTNENINKMIRRFLPKGTDFRKVTAAYIQRVETWINNYPREILGFETSGSLFERYVAEAA
nd12	fig|12333.103.peg.39	peg	nd12_26504_26755	26504	26755	+	hypothetical protein				ttgaacggatacagttatttgacgctggaacagcgccgcgagatcgaaagaatgtatgcagagggtgaacgcgttgttgacattgccgcccgtctgaaaaggagcgccgccgctatctacgaagagttgaagcgcggctatacgggagagtttgacggctacgcccgcccgaagtacagcgccgatcttgcacaagcgacggtgcaagagaatttccgacgcagaggaaaccgacgcggcgcgaattgctga	MNGYSYLTLEQRREIERMYAEGERVVDIAARLKRSAAAIYEELKRGYTGEFDGYARPKYSADLAQATVQENFRRRGNRRGANC
nd12	fig|12333.103.peg.40	peg	nd12_26778_27287	26778	27287	+	hypothetical protein				atgacacagtttaacaacgagctttacgcggggttcttgccggaagcgggcgacgcgcgcttcgagggaaagcggggcttctatcctgcaatgacggcggaagaatacagagcgcttccgcttccgatgaaatgcgcaacgtgggacgcgcgcgttcagtatgtgatcttcgatagctatttcagagattatgagctttccggaaaagtcgaggttcacgccgaaaacgcattcaaggcgcttttccgccacagcgaaaccgacacgcagttatacagcgtttgcgccgttcgcctttttgacggaacgcgcgttgcggcgaagtgggttcaagacagcgtttcgggcgcattccggattgtaacgacttccggaaacgtgctgggtacgcaaggcggc…	MTQFNNELYAGFLPEAGDARFEGKRGFYPAMTAEEYRALPLPMKCATWDARVQYVIFDSYFRDYELSGKVEVHAENAFKALFRHSETDTQLYSVCAVRLFDGTRVAAKWVQDSVSGAFRIVTTSGNVLGTQGGFRGHIPENCKKRDDGTWGLFPLDRTADRKQIIRVAF
nd12	fig|12333.103.peg.41	peg	nd12_27310_27534	27310	27534	+	hypothetical protein				atgagcgacagaagaacagcgtttgacgctatcacgaaggacaagcccacgctggcgggcttccttcgttcccttccttgcattgaagcgccgtgggacgcggcttttcagaagcgttattgctcttcctgcacggcggagaattgcgacgcttgcgcgaatgagcagttccggaacaatccggaatggtggctttcccttccggcggcggaggtggaacaatga	MSDRRTAFDAITKDKPTLAGFLRSLPCIEAPWDAAFQKRYCSSCTAENCDACANEQFRNNPEWWLSLPAAEVEQ
nd12	fig|12333.103.peg.42	peg	nd12_27531_28262	27531	28262	+	hypothetical protein				atgacggcggatcgggcgcgcggagcgcttgccgtcctgcaagacgcggacgggaagtttatttgcgaagtgccttgcggttacatagtcgagcagacagccagcgcacacaagccccggcggatacaggcacaacgacggcggcgggcaatgcttcgccgtcgcgtcgcccttacggttgcattgctgaccgttgccgcccttcttgcggcgcttatgccgtggagcgggagcggtgcggcggacaagccgaaggacacgaccgccggaacgcttgaagaggtacaccagccgaccgccgttcttcttccttcgagcgggacggtggcggaatatgtgccgaacgcggcggaggttgaagcccttgcaaaactgatctacggcgaagcggggatcgtt…	MTADRARGALAVLQDADGKFICEVPCGYIVEQTASAHKPRRIQAQRRRRAMLRRRVALTVALLTVAALLAALMPWSGSGAADKPKDTTAGTLEEVHQPTAVLLPSSGTVAEYVPNAAEVEALAKLIYGEAGIVPSTTEQAAVVWCVLNRVDDPRFPNTVLEVIEAPYQFSGYDPEYPVKEEFALLAADVLTRYRAERDGEENVGRVLPAEYCFFTGDGRRNHFTTEWKSTDCFGWTLESPYTN
nd12	fig|12333.103.peg.43	peg	nd12_28276_28716	28276	28716	+	Phage protein				atgcttgaaatcagacctacgcacttaaagcccgcccgcgagttcgtcgggaaataccatcggcacaatataccgccagttggcggaaagttcgcgatttcctgctttgaaggcgaacggctttgcggcgttgcaatatgcggcagacctacggcgcggaaacttgacgacggcgcgacgcttgaaatctatcggaattgcaccgacgggacaagaaacgcttgtacgaagctgtacggcgcttgtgtccggatcgcccgcgatatgggatacaagaaggtcattacctacacgctggagagcgaaaacggcgcttcccttcgcgcggcaaacttcacgttcgcgggatcggcgggcgggatcgcttggacagggacacgccgccgcgattactacgta…	MLEIRPTHLKPAREFVGKYHRHNIPPVGGKFAISCFEGERLCGVAICGRPTARKLDDGATLEIYRNCTDGTRNACTKLYGACVRIARDMGYKKVITYTLESENGASLRAANFTFAGSAGGIAWTGTRRRDYYVSPEEMKNRWEYVL
nd12	fig|12333.103.peg.44	peg	nd12_28731_29033	28731	29033	+	hypothetical protein				atgaaggacaacaaaagcggctggcagttcccgaaggcgcttgaaatcatcaagtgcaaggaaggcaacaaagagtttatgaaggagcgtccggcgcgtcgcccgttcggaaacaccgtgcttatttgcgaatacccgatcgacgacacggcggcggaagagccgaacgcgaagttgattacatggcggcttgcgaagcgcgccgcgcgggacttcttgcgcgtttcctttatgccttcggctatcgtatcggcggcgacgcatggcgggaaaaccgccgtccgcgtctacggtaaatattaa	MKDNKSGWQFPKALEIIKCKEGNKEFMKERPARRPFGNTVLICEYPIDDTAAEEPNAKLITWRLAKRAARDFLRVSFMPSAIVSAATHGGKTAVRVYGKY
nd12	fig|12333.103.peg.45	peg	nd12_29059_29322	29059	29322	+	hypothetical protein				atgttcagcaagaaaaagaccgaatgccgcgtttgcggctatcgcttcacaccggggcgggaaaacatctacacggcggaagaaccgcgttctatggcggatatgctgacgaaagcgccgacgcgcttttcggcggttgattgtccggtttgcggttgccaaatcgcgctggcgatccgcgcgccgcgcattgactttccggctattgtagaacggcacgacgcggacgcagaggaaacggagggcggcgaagatgaagattaa	MFSKKKTECRVCGYRFTPGRENIYTAEEPRSMADMLTKAPTRFSAVDCPVCGCQIALAIRAPRIDFPAIVERHDADAEETEGGEDED
nd12	fig|12333.103.peg.46	peg	nd12_29312_29986	29312	29986	+	hypothetical protein				atgaagattaaaagtatcgccgctatatgcaaaaagaacaagaatattgcgatcttcgagcggtacagcgacgacggcgacatattaacgcagtacatcggcgacggatcggcggtttatccggttgtcgggcttccccagcttgacaaagaaagccttttgacgatcttcgacgttccggagaaagaccgcgacaattacttcgtgaaaacgctgggcgttccggcgggtatcagtttcgaggacacagacgaaacggaaagacacgtcgagcgggaaggaatttcgatcatctattccggacgaaccttgaagccgatccgcacaacgcgcgggctggtattcatcgaaagccgctatctttcgcccgttgctgacgtgctggacgtgctggagctt…	MKIKSIAAICKKNKNIAIFERYSDDGDILTQYIGDGSAVYPVVGLPQLDKESLLTIFDVPEKDRDNYFVKTLGVPAGISFEDTDETERHVEREGISIIYSGRTLKPIRTTRGLVFIESRYLSPVADVLDVLELYERRTAEGTPYIVAKAGFLLQAVIMPYDVINQQFVESLQDLTRECEFSLSEKERREREARDRFTFTEPEQCSLNVDPDTGEVVEESEVADE
nd12	fig|12333.103.peg.47	peg	nd12_29983_30411	29983	30411	+	hypothetical protein				atgaacgcggcgcttctatcctctaaaaatatgtgctggtgtacgccgcaagacttcttcgacaagctgaacgccgaattcggcttcgtgcttgatccggcggcgaccgacaagacggcgaaatgctctttgtattacacgccggaaacggacgggctttcgcaaagctgggatcgcggcggcgcggtattctgcaatccgccttacggacgcgagatcggcaagtgggttcaaaaggctttcgaggaagcgcgggggggggtatccgattgttttacttatcccagcgcggacggatacggcatattttcacgattacatttacgggaaagcggaaatccgcttcgtgcgcgggcggctacggttcacggacgacgacgggaacgccgccgatcccgc…	MNAALLSSKNMCWCTPQDFFDKLNAEFGFVLDPAATDKTAKCSLYYTPETDGLSQSWDRGGAVFCNPPYGREIGKWVQKAFEEARGGVSDCFTYPSADGYGIFSRLHLRESGNPLRARAATVHGRRRERRRSRALPVNGSYL
nd12	fig|12333.103.peg.48	peg	nd12_30429_30854	30429	30854	+	hypothetical protein				atgaataaccgacaggaaaagccgcccttgaagtgcttgctgggcattgatccggagaaaacgcagaaatgcaagccttcggaatgcgcttcttgcggctgggaagcggcagaagccgcgcggcggcgggagtacatgaaggaacacggcttgacgctatgcgccgacggcttccggcggctaattattaggaaggagaaagacatggcaacaccttataaggaatgcccgcattgcggcgcacatcttgacagcggcgaaaagtgcgaatgccgcgcagaggaaatcgaagcgaagaattcgcagaaatacgcttgcgggcttacggaacaggacgttgaaagcggctgggaatgcccgcttgataatccgaacgaaactgtcgaacgttgcgaagat…	MNNRQEKPPLKCLLGIDPEKTQKCKPSECASCGWEAAEAARRREYMKEHGLTLCADGFRRLIIRKEKDMATPYKECPHCGAHLDSGEKCECRAEEIEAKNSQKYACGLTEQDVESGWECPLDNPNETVERCEDCAFAKETD
nd12	fig|12333.103.peg.49	peg	nd12_30872_31291	30872	31291	+	hypothetical protein				atgacaattaacgagtttgcggcagaggttcacaagaacgccgttgaacacggctggtgggaaggcgaaagaacgtttccggagatcgtggcgcttattcattcggaggtatccgaagcgctggaggaataccgcgacgggaagccgcttctttatttcccttgcaacgctggcggggtttgttgcgaagaggacggaagcgcgcattgcggaagccgcccttacgatccggaaaatccgaacgcccgttgttccgcgcagagcaagaagcccgaagggatcgcggcagagcttgccgacgtgattattcgcgttcttgattattgcgcgtatgccggaattgacattgaaaacgtgctggaggtaaagcacgaatacaacaaaagccgcccgtatcgg…	MTINEFAAEVHKNAVEHGWWEGERTFPEIVALIHSEVSEALEEYRDGKPLLYFPCNAGGVCCEEDGSAHCGSRPYDPENPNARCSAQSKKPEGIAAELADVIIRVLDYCAYAGIDIENVLEVKHEYNKSRPYRHGGKKC
nd12	fig|12333.103.peg.50	peg	nd12_31285_32178	31285	32178	+	hypothetical protein				gtgttaatcatggcggagcgggtgaaccacccgccgcattacaacgcgggcgggattgagtgtatcgacgcgctggaagccgcgacaagcgggcttcaaggtatcgaagccttttgcacagcgaacgcgatcaagtatttgtggcgctggaagctgaaaaacggtgaagaggacttgcaaaaggcggtttggtatatcaacagacttattcaacgagcgggcgcagacaacgccgcaggaaaggagctattcaatatgaaagagaacaaacacggcttcgagccgaaacaggaattcacgatgggcgggatcgcttggacggtcattcagacgggcgcggattgggtgaagtgcattgcttccgattgcgtcgaggaacgcgccttcgatgaagggaac…	MLIMAERVNHPPHYNAGGIECIDALEAATSGLQGIEAFCTANAIKYLWRWKLKNGEEDLQKAVWYINRLIQRAGADNAAGKELFNMKENKHGFEPKQEFTMGGIAWTVIQTGADWVKCIASDCVEERAFDEGNKNDFAASSLRAYLNGEFLRRLIKAGAPEEMFEYFNIDLTADDGLKNYGGDRVRIGLITCEEYRLLRGNIPALPDRWWWTATPDSPINSFVRYVTSDGSLSFDLAYGGRYGVRPLCNLKSEILVSYLNGENAEEQKKRAEAVDMMKHIAAAWDIDAEEVFGRADE
nd12	fig|12333.103.peg.51	peg	nd12_32175_32321	32175	32321	+	hypothetical protein				atgacaatgtatcaattcatggtgaacgccttttatatgctttgcggcgttgcttgcgtcgccgcttccgttgtgatcgtctacatcgttttgaacgtgcttttcagagcgcttcggaggggcggcgggaacaatggcagatattaa	MTMYQFMVNAFYMLCGVACVAASVVIVYIVLNVLFRALRRGGGNNGRY
nd12	fig|12333.103.peg.52	peg	nd12_32308_32700	32308	32700	+	hypothetical protein				atggcagatattaagatcgacgaagaattgcttttgcgcgcagggctggggatcggctacgcgttcgcgccattctttcggggcattttagaaggcgttgaagattacacgatcgaacaggcggcgcgggaaatgcaggaagaacacgacgcgcaggaagccgaagagggcttgaaacgtccggttgaaaaaacgctgatcggcgattgccggaagtgctggtgcgatcaatgcgcgaagctggaacaatgcgttcacttgcgcgaaggcgcgcttccggacggggtacgcccgttcccttgcgtcgggtgcgcggacggaatgcgcttcaagccttgtgaagaagaacggtgcgccgatttcgagcagggcgcaggatttaataacggctga	MADIKIDEELLLRAGLGIGYAFAPFFRGILEGVEDYTIEQAAREMQEEHDAQEAEEGLKRPVEKTLIGDCRKCWCDQCAKLEQCVHLREGALPDGVRPFPCVGCADGMRFKPCEEERCADFEQGAGFNNG
